# Supplementary material for: Sewage and Organic Pollution Compounds in Nairobi River Urban Sediments Characterized by Fourier Transform Ion Cyclotron Resonance Mass Spectrometry (FT–ICR–MS)
Source: PubMed Central journal article supplement (PMC11450967; doi:10.1021/jasms.4c00229), 2024-09-03
Supplement: js4c00229_si_001.pdf [file js4c00229_si_001.pdf]

## **Supporting Information**

### **Sewage and organic pollution compounds in Nairobi River urban sediments characterized by Fourier transform ion cyclotron resonance mass spectrometry (FT-ICR-MS)**

Rory P. Downham<sup>a</sup>, Christopher H. Vane<sup>b</sup>, Benedict Gannon<sup>a</sup>, Lydia A. Olaka<sup>c</sup>, and Mark P. Barrow<sup>a\*</sup>

- a. Department of Chemistry, University of Warwick, Coventry, CV4 7AL, UK
- b. British Geological Survey, Organic Geochemistry Facility, Keyworth, Nottingham, NG12 5GG, UK
- c. Technical University of Kenya, Department of Geoscience and Environment, P.O. Box 52428-00200, Nairobi, Kenya

\*Mark P. Barrow - Department of Chemistry, University of Warwick, Coventry, CV4 7AL, UK; [orcid.org/0000-0002-6474-5357](https://orcid.org/0000-0002-6474-5357); Email: [m.p.barrow@warwick.ac.uk](mailto:m.p.barrow@warwick.ac.uk)

## Supplementary Tables

Table S.1: Details for the steroid standards.

| Compound name                                                    | Formula                           | CAS no.  | Structure                                                                            | Product details                      |
|------------------------------------------------------------------|-----------------------------------|----------|--------------------------------------------------------------------------------------|--------------------------------------|
| Cholesterol<br>(5-Cholesten-3 $\beta$ -ol)                       | C <sub>27</sub> H <sub>46</sub> O | 57-88-5  | 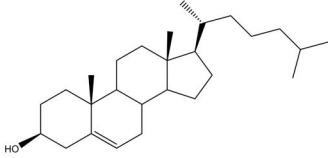   | CRS, European Pharmacopoeia C2155000 |
| $\beta$ -Sitosterol<br>(Stigmast-5-en-3 $\beta$ -ol)             | C <sub>29</sub> H <sub>50</sub> O | 83-46-5  |    | Avanti Polar Lipids 700095           |
| Stigmasterol<br>(Stigmasta-5,22-dien-3 $\beta$ -ol)              | C <sub>29</sub> H <sub>48</sub> O | 83-48-7  |   | Avanti Polar Lipids 700062(P)        |
| Coprostanol<br>(5 $\beta$ -Cholestan-3 $\beta$ -ol)              | C <sub>27</sub> H <sub>48</sub> O | 360-68-9 |  | Sigma Aldrich C7578                  |
| Cholestanol<br>(5 $\alpha$ -Cholestan-3 $\beta$ -ol)             | C <sub>27</sub> H <sub>48</sub> O | 80-97-7  |  | Avanti Polar Lipids 700064(P)        |
| 5 $\alpha$ -Sitostanol<br>(5 $\alpha$ -Stigmastan-3 $\beta$ -ol) | C <sub>29</sub> H <sub>52</sub> O | 83-45-4  |  | Avanti Polar Lipids 700121(P)        |

Table S.2: Homologous series for recalibrating sediment APPI-FTICR mass spectra.

| Ion formulae (homologous series)                                                                                                      | m/z range                |
|---------------------------------------------------------------------------------------------------------------------------------------|--------------------------|
| [C <sub>21</sub> H <sub>32</sub> +H] <sup>+</sup> to [C <sub>56</sub> H <sub>102</sub> +H] <sup>+</sup>                               | 285.257677 to 775.805429 |
| [C <sub>19</sub> H <sub>30</sub> +H] <sup>+</sup> to [C <sub>57</sub> H <sub>106</sub> +H] <sup>+</sup>                               | 259.242027 to 791.836729 |
| [C <sub>21</sub> H <sub>42</sub> O <sub>1</sub> +H] <sup>+</sup> to [C <sub>53</sub> H <sub>106</sub> O <sub>1</sub> +H] <sup>+</sup> | 311.330842 to 759.831644 |

Table S.3: Steroid standard broadband recalibration lists

| Compound                    | Ion formula                                        | Ion mass (calculated) |
|-----------------------------|----------------------------------------------------|-----------------------|
| Cholesterol                 | [C <sub>27</sub> H <sub>46</sub> O] <sup>++</sup>  | 386.354318            |
|                             | [C <sub>27</sub> H <sub>42</sub> O+H] <sup>+</sup> | 383.330842            |
|                             | [C <sub>27</sub> H <sub>44</sub> +H] <sup>+</sup>  | 369.351578            |
|                             | [C <sub>27</sub> H <sub>44</sub> ] <sup>++</sup>   | 368.343752            |
| β -Sitosterol               | [C <sub>29</sub> H <sub>50</sub> O] <sup>++</sup>  | 414.385617            |
|                             | [C <sub>29</sub> H <sub>48</sub> +H] <sup>+</sup>  | 397.382878            |
|                             | [C <sub>29</sub> H <sub>46</sub> O+H] <sup>+</sup> | 411.362142            |
|                             | [C <sub>29</sub> H <sub>48</sub> ] <sup>++</sup>   | 396.375053            |
| Stigmasterol                | [C <sub>29</sub> H <sub>48</sub> O] <sup>++</sup>  | 412.369967            |
|                             | [C <sub>29</sub> H <sub>46</sub> +H] <sup>+</sup>  | 395.367228            |
|                             | [C <sub>29</sub> H <sub>46</sub> ] <sup>++</sup>   | 394.359402            |
|                             | [C <sub>28</sub> H <sub>42</sub> +H] <sup>+</sup>  | 379.335927            |
| Coprostanol and cholestanol | [C <sub>27</sub> H <sub>48</sub> O] <sup>++</sup>  | 388.369967            |
|                             | [C <sub>27</sub> H <sub>46</sub> +H] <sup>+</sup>  | 371.367228            |
|                             | [C <sub>26</sub> H <sub>44</sub> O+H] <sup>+</sup> | 373.346492            |
|                             | [C <sub>26</sub> H <sub>42</sub> +H] <sup>+</sup>  | 355.335927            |
| 5α-Sitostanol               | [C <sub>29</sub> H <sub>52</sub> O] <sup>++</sup>  | 416.401267            |
|                             | [C <sub>28</sub> H <sub>48</sub> O+H] <sup>+</sup> | 401.377792            |
|                             | [C <sub>29</sub> H <sub>50</sub> +H] <sup>+</sup>  | 399.398528            |
|                             | [C <sub>28</sub> H <sub>46</sub> +H] <sup>+</sup>  | 383.367228            |

Table S.4: Steroid standard CID recalibration lists.

| Compound                    | Ion formula (simplified)                         | Ion mass (calculated) |
|-----------------------------|--------------------------------------------------|-----------------------|
| Cholesterol                 | [C <sub>27</sub> H <sub>46</sub> O] <sup>+</sup> | 386.354318            |
|                             | [C <sub>27</sub> H <sub>44</sub> ] <sup>+</sup>  | 368.343753            |
|                             | [C <sub>26</sub> H <sub>43</sub> O] <sup>+</sup> | 371.330842            |
|                             | [C <sub>26</sub> H <sub>41</sub> ] <sup>+</sup>  | 353.320278            |
|                             | [C <sub>24</sub> H <sub>38</sub> ] <sup>+</sup>  | 326.296803            |
|                             | [C <sub>22</sub> H <sub>37</sub> ] <sup>+</sup>  | 301.288978            |
|                             | [C <sub>19</sub> H <sub>27</sub> ] <sup>+</sup>  | 255.210727            |
|                             | [C <sub>16</sub> H <sub>23</sub> O] <sup>+</sup> | 231.174342            |
|                             | [C <sub>16</sub> H <sub>21</sub> ] <sup>+</sup>  | 213.163777            |
| β-Sitosterol                | [C <sub>29</sub> H <sub>50</sub> O] <sup>+</sup> | 414.385617            |
|                             | [C <sub>28</sub> H <sub>47</sub> O] <sup>+</sup> | 399.362142            |
|                             | [C <sub>28</sub> H <sub>45</sub> ] <sup>+</sup>  | 381.351577            |
|                             | [C <sub>26</sub> H <sub>42</sub> ] <sup>+</sup>  | 354.328102            |
|                             | [C <sub>24</sub> H <sub>41</sub> ] <sup>+</sup>  | 329.320277            |
|                             | [C <sub>19</sub> H <sub>29</sub> O] <sup>+</sup> | 273.221292            |
|                             | [C <sub>19</sub> H <sub>27</sub> ] <sup>+</sup>  | 255.210727            |
|                             | [C <sub>16</sub> H <sub>23</sub> O] <sup>+</sup> | 231.174342            |
|                             | [C <sub>16</sub> H <sub>21</sub> ] <sup>+</sup>  | 213.163777            |
| Stigmasterol                | [C <sub>29</sub> H <sub>48</sub> O] <sup>+</sup> | 412.369967            |
|                             | [C <sub>29</sub> H <sub>46</sub> ] <sup>+</sup>  | 394.359402            |
|                             | [C <sub>28</sub> H <sub>43</sub> ] <sup>+</sup>  | 379.335927            |
|                             | [C <sub>19</sub> H <sub>27</sub> O] <sup>+</sup> | 271.205641            |
|                             | [C <sub>15</sub> H <sub>17</sub> ] <sup>+</sup>  | 197.132477            |
|                             | [C <sub>14</sub> H <sub>17</sub> ] <sup>+</sup>  | 185.132477            |
| Coprostanol and cholestanol | [C <sub>27</sub> H <sub>48</sub> O] <sup>+</sup> | 388.369967            |
|                             | [C <sub>27</sub> H <sub>46</sub> ] <sup>+</sup>  | 370.359402            |
|                             | [C <sub>26</sub> H <sub>43</sub> ] <sup>+</sup>  | 355.335927            |
|                             | [C <sub>19</sub> H <sub>34</sub> ] <sup>+</sup>  | 262.265502            |
|                             | [C <sub>16</sub> H <sub>25</sub> O] <sup>+</sup> | 233.189991            |
|                             | [C <sub>16</sub> H <sub>23</sub> ] <sup>+</sup>  | 215.179427            |
| 5α-Sitostanol               | [C <sub>29</sub> H <sub>52</sub> O] <sup>+</sup> | 416.401267            |
|                             | [C <sub>28</sub> H <sub>49</sub> O] <sup>+</sup> | 401.377792            |
|                             | [C <sub>28</sub> H <sub>47</sub> ] <sup>+</sup>  | 383.367228            |
|                             | [C <sub>21</sub> H <sub>38</sub> ] <sup>+</sup>  | 290.296802            |
|                             | [C <sub>16</sub> H <sub>25</sub> O] <sup>+</sup> | 233.189991            |
|                             | [C <sub>16</sub> H <sub>23</sub> ] <sup>+</sup>  | 215.179427            |

Table S.5. Cholesterol monoisotopic ions detected via broadband APPI-FTICR MS (in propanol and toluene, but not dichloromethane), with a relative intensity > 1%.

| Peak m/z  | Relative intensity, % | Assigned m/z | Ion formula                                                      | Interpretation                                      | Detected by van Agthoven et al.? <sup>1</sup> |
|-----------|-----------------------|--------------|------------------------------------------------------------------|-----------------------------------------------------|-----------------------------------------------|
| 369.35158 | 100                   | 369.351578   | [C <sub>27</sub> H <sub>44</sub> +H] <sup>+</sup>                | [M+H-H <sub>2</sub> O] <sup>+</sup>                 | Y                                             |
| 368.34375 | 92.96                 | 368.343753   | [C <sub>27</sub> H <sub>44</sub> ] <sup>•+</sup>                 | [M-H <sub>2</sub> O] <sup>•+</sup>                  | Y                                             |
| 386.35431 | 60.77                 | 386.354318   | [C <sub>27</sub> H <sub>46</sub> O] <sup>•+</sup>                | [M] <sup>•+</sup>                                   | Y                                             |
| 385.34651 | 7.74                  | 385.346492   | [C <sub>27</sub> H <sub>44</sub> O+H] <sup>+</sup>               | [M+H-H <sub>2</sub> ] <sup>+</sup>                  | Y                                             |
| 371.33086 | 7.49                  | 371.330842   | [C <sub>26</sub> H <sub>42</sub> O+H] <sup>+</sup>               | [M+H-CH <sub>4</sub> ] <sup>+</sup>                 | Y                                             |
| 383.33085 | 6.89                  | 383.330842   | [C <sub>27</sub> H <sub>42</sub> O+H] <sup>+</sup>               | [M+H-4H] <sup>+</sup>                               | Y                                             |
| 384.33868 | 4.14                  | 384.338667   | [C <sub>27</sub> H <sub>44</sub> O] <sup>•+</sup>                | [M-H <sub>2</sub> ] <sup>•+</sup>                   | Y                                             |
| 353.32031 | 3.78                  | 353.320278   | [C <sub>26</sub> H <sub>40</sub> +H] <sup>+</sup>                |                                                     | Y                                             |
| 367.33596 | 2.55                  | 367.335928   | [C <sub>27</sub> H <sub>42</sub> +H] <sup>+</sup>                | [M+H-H <sub>2</sub> O-H <sub>2</sub> ] <sup>+</sup> | Y                                             |
| 301.28903 | 2.40                  | 301.288978   | [C <sub>22</sub> H <sub>36</sub> +H] <sup>+</sup>                |                                                     | Y                                             |
| 177.16386 | 1.92                  | 177.163777   | [C <sub>13</sub> H <sub>20</sub> +H] <sup>+</sup>                | Solvent background ion                              | N                                             |
| 401.34142 | 1.11                  | 401.341407   | [C <sub>27</sub> H <sub>44</sub> O <sub>2</sub> +H] <sup>+</sup> | [M+H+O-H <sub>2</sub> ] <sup>+</sup>                | Y                                             |
| 366.32813 | 1.09                  | 366.328103   | [C <sub>27</sub> H <sub>42</sub> ] <sup>•+</sup>                 | [M-H <sub>2</sub> O-H <sub>2</sub> ] <sup>•+</sup>  | Y                                             |
| 382.32302 | 1.05                  | 382.323017   | [C <sub>27</sub> H <sub>42</sub> O] <sup>•+</sup>                | [M-4H] <sup>•+</sup>                                | Y                                             |

Table S.6. *β*-sitosterol monoisotopic ions detected via broadband APPI-FTICR MS (in propanol and toluene), with a relative intensity > 1%.

| Peak m/z  | Relative intensity, % | Assigned m/z | Ion formula                                                      | Interpretation                                       |
|-----------|-----------------------|--------------|------------------------------------------------------------------|------------------------------------------------------|
| 397.38288 | 100.00                | 397.382878   | [C <sub>29</sub> H <sub>48</sub> +H] <sup>+</sup>                | [M+H-H <sub>2</sub> O] <sup>+</sup>                  |
| 396.37505 | 81.18                 | 396.375053   | [C <sub>29</sub> H <sub>48</sub> ] <sup>•+</sup>                 | [M-H <sub>2</sub> O] <sup>•+</sup>                   |
| 414.38561 | 71.19                 | 414.385618   | [C <sub>29</sub> H <sub>50</sub> O] <sup>•+</sup>                | [M] <sup>•+</sup>                                    |
| 411.36215 | 12.94                 | 411.362143   | [C <sub>29</sub> H <sub>46</sub> O+H] <sup>+</sup>               | [M+H-4H] <sup>+</sup>                                |
| 413.37778 | 12.43                 | 413.377793   | [C <sub>29</sub> H <sub>48</sub> O+H] <sup>+</sup>               | [M+H-H <sub>2</sub> ] <sup>+</sup>                   |
| 412.36996 | 7.22                  | 412.369968   | [C <sub>29</sub> H <sub>48</sub> O] <sup>•+</sup>                | [M-H <sub>2</sub> ] <sup>•+</sup>                    |
| 487.42978 | 6.12                  | 487.429828   | [C <sub>36</sub> H <sub>54</sub> +H] <sup>+</sup>                | Unknown                                              |
| 399.36215 | 5.54                  | 399.362143   | [C <sub>28</sub> H <sub>46</sub> O+H] <sup>+</sup>               | [M+H-CH <sub>4</sub> ] <sup>+</sup>                  |
| 443.38835 | 4.23                  | 443.388357   | [C <sub>30</sub> H <sub>50</sub> O <sub>2</sub> +H] <sup>+</sup> | Unknown                                              |
| 381.35157 | 4.06                  | 381.351578   | [C <sub>28</sub> H <sub>44</sub> +H] <sup>+</sup>                | [M+H-CH <sub>4</sub> -H <sub>2</sub> O] <sup>+</sup> |
| 503.42472 | 3.86                  | 503.424743   | [C <sub>36</sub> H <sub>54</sub> O+H] <sup>+</sup>               | Unknown                                              |
| 429.37270 | 3.17                  | 429.372707   | [C <sub>29</sub> H <sub>48</sub> O <sub>2</sub> +H] <sup>+</sup> | Contaminant                                          |
| 177.16376 | 2.83                  | 177.163777   | [C <sub>13</sub> H <sub>20</sub> +H] <sup>+</sup>                | Solvent background ion                               |
| 395.36725 | 2.80                  | 395.367228   | [C <sub>29</sub> H <sub>46</sub> +H] <sup>+</sup>                | [M+H-H <sub>2</sub> -H <sub>2</sub> O] <sup>+</sup>  |
| 410.35433 | 1.61                  | 410.354318   | [C <sub>29</sub> H <sub>46</sub> O] <sup>•+</sup>                | [M-4H] <sup>•+</sup>                                 |
| 383.36722 | 1.58                  | 383.367228   | [C <sub>28</sub> H <sub>46</sub> +H] <sup>+</sup>                | [M+H-CH <sub>4</sub> O] <sup>+</sup>                 |
| 329.32025 | 1.57                  | 329.320278   | [C <sub>24</sub> H <sub>40</sub> +H] <sup>+</sup>                |                                                      |
| 427.35704 | 1.26                  | 427.357057   | [C <sub>29</sub> H <sub>46</sub> O <sub>2</sub> +H] <sup>+</sup> | Contaminant                                          |
| 428.36485 | 1.22                  | 428.364882   | [C <sub>29</sub> H <sub>48</sub> O <sub>2</sub> ] <sup>•+</sup>  | [M+O-H <sub>2</sub> ] <sup>•+</sup>                  |
| 394.35940 | 1.18                  | 394.359403   | [C <sub>29</sub> H <sub>46</sub> ] <sup>•+</sup>                 | [M-H <sub>2</sub> O-H <sub>2</sub> ] <sup>•+</sup>   |
| 485.43527 | 1.09                  | 485.435307   | [C <sub>33</sub> H <sub>56</sub> O <sub>2</sub> +H] <sup>+</sup> | Unknown                                              |
| 382.35940 | 1.04                  | 382.359403   | [C <sub>28</sub> H <sub>46</sub> ] <sup>•+</sup>                 | [M-CH <sub>4</sub> O] <sup>•+</sup>                  |
| 489.40907 | 1.00                  | 489.409093   | [C <sub>35</sub> H <sub>52</sub> O+H] <sup>+</sup>               | Unknown                                              |

Table S.7: Stigmasterol monoisotopic ions detected via broadband APPI-FTICR MS (in propanol and toluene), with a relative intensity > 1%.

| Peak m/z  | Relative intensity, % | Assigned m/z | Ion formula                                                      | Interpretation                                                     |
|-----------|-----------------------|--------------|------------------------------------------------------------------|--------------------------------------------------------------------|
| 412.36996 | 100.00                | 412.369968   | [C <sub>29</sub> H <sub>48</sub> O] <sup>•+</sup>                | [M] <sup>•+</sup>                                                  |
| 395.36723 | 59.01                 | 395.367228   | [C <sub>29</sub> H <sub>46</sub> +H] <sup>+</sup>                | [M+H-H <sub>2</sub> O] <sup>+</sup>                                |
| 394.35942 | 42.64                 | 394.359403   | [C <sub>29</sub> H <sub>46</sub> ] <sup>•+</sup>                 | [M-H <sub>2</sub> O] <sup>•+</sup>                                 |
| 409.34652 | 8.62                  | 409.346492   | [C <sub>29</sub> H <sub>44</sub> O+H] <sup>+</sup>               | [M+H-4H] <sup>+</sup>                                              |
| 369.31516 | 7.92                  | 369.315192   | [C <sub>26</sub> H <sub>40</sub> O+H] <sup>+</sup>               | [M+H-C <sub>3</sub> H <sub>8</sub> ] <sup>+</sup>                  |
| 300.24459 | 7.67                  | 300.244767   | [C <sub>21</sub> H <sub>32</sub> O] <sup>•+</sup>                | [M-C <sub>8</sub> H <sub>16</sub> ] <sup>•+</sup>                  |
| 411.36217 | 5.89                  | 411.362143   | [C <sub>29</sub> H <sub>46</sub> O+H] <sup>+</sup>               | [M+H-H <sub>2</sub> ] <sup>+</sup>                                 |
| 379.33592 | 4.14                  | 379.335928   | [C <sub>28</sub> H <sub>42</sub> +H] <sup>+</sup>                | [M+H-CH <sub>4</sub> -H <sub>2</sub> O] <sup>+</sup>               |
| 255.21051 | 4.12                  | 255.210727   | [C <sub>19</sub> H <sub>26</sub> +H] <sup>+</sup>                | [M+H-C <sub>10</sub> H <sub>22</sub> O] <sup>+</sup>               |
| 351.30456 | 4.08                  | 351.304628   | [C <sub>26</sub> H <sub>38</sub> +H] <sup>+</sup>                | [M+H-C <sub>3</sub> H <sub>8</sub> -H <sub>2</sub> O] <sup>+</sup> |
| 271.20544 | 4.02                  | 271.205642   | [C <sub>19</sub> H <sub>26</sub> O+H] <sup>+</sup>               | [M+H-C <sub>10</sub> H <sub>22</sub> ] <sup>+</sup>                |
| 397.34651 | 3.77                  | 397.346492   | [C <sub>28</sub> H <sub>44</sub> O+H] <sup>+</sup>               | [M+H-CH <sub>4</sub> ] <sup>+</sup>                                |
| 314.26026 | 2.95                  | 314.260417   | [C <sub>22</sub> H <sub>34</sub> O] <sup>•+</sup>                | [M-C <sub>7</sub> H <sub>14</sub> ] <sup>•+</sup>                  |
| 410.35436 | 2.94                  | 410.354318   | [C <sub>29</sub> H <sub>46</sub> O] <sup>•+</sup>                | [M-H <sub>2</sub> ] <sup>•+</sup>                                  |
| 311.27317 | 2.92                  | 311.273328   | [C <sub>23</sub> H <sub>34</sub> +H] <sup>+</sup>                |                                                                    |
| 427.35713 | 2.87                  | 427.357057   | [C <sub>29</sub> H <sub>46</sub> O <sub>2</sub> +H] <sup>+</sup> | Contaminant                                                        |
| 410.39074 | 2.81                  | 410.390703   | [C <sub>30</sub> H <sub>50</sub> ] <sup>•+</sup>                 | Contaminant                                                        |
| 299.23676 | 2.51                  | 299.236942   | [C <sub>21</sub> H <sub>30</sub> O+H] <sup>+</sup>               |                                                                    |
| 282.23401 | 1.67                  | 282.234202   | [C <sub>21</sub> H <sub>30</sub> ] <sup>•+</sup>                 |                                                                    |
| 407.33089 | 1.66                  | 407.330842   | [C <sub>29</sub> H <sub>42</sub> O+H] <sup>+</sup>               |                                                                    |
| 393.35161 | 1.54                  | 393.351578   | [C <sub>29</sub> H <sub>44</sub> +H] <sup>+</sup>                |                                                                    |
| 270.19761 | 1.46                  | 270.197817   | [C <sub>19</sub> H <sub>26</sub> O] <sup>•+</sup>                |                                                                    |
| 272.21327 | 1.42                  | 272.213467   | [C <sub>19</sub> H <sub>28</sub> O] <sup>•+</sup>                |                                                                    |
| 297.2575  | 1.37                  | 297.257677   | [C <sub>22</sub> H <sub>32</sub> +H] <sup>+</sup>                |                                                                    |
| 273.22109 | 1.15                  | 273.221292   | [C <sub>19</sub> H <sub>28</sub> O+H] <sup>+</sup>               |                                                                    |
| 398.35431 | 1.12                  | 398.354318   | [C <sub>28</sub> H <sub>46</sub> O] <sup>•+</sup>                |                                                                    |
| 381.3516  | 1.11                  | 381.351578   | [C <sub>28</sub> H <sub>44</sub> +H] <sup>+</sup>                |                                                                    |
| 408.33872 | 1.09                  | 408.338667   | [C <sub>29</sub> H <sub>44</sub> O] <sup>•+</sup>                |                                                                    |
| 396.3387  | 1.06                  | 396.338667   | [C <sub>28</sub> H <sub>44</sub> O] <sup>•+</sup>                |                                                                    |

Table S.8. Coprostanol monoisotopic ions detected via broadband APPI-FTICR MS (in propanol and toluene), with a relative intensity > 1%.

| Peak m/z  | Relative intensity, % | Assigned m/z | Ion formula                                                      | Interpretation                                       |
|-----------|-----------------------|--------------|------------------------------------------------------------------|------------------------------------------------------|
| 388.36997 | 100.00                | 388.36997    | [C <sub>27</sub> H <sub>48</sub> O] <sup>•+</sup>                | [M] <sup>•+</sup>                                    |
| 373.34649 | 46.33                 | 373.34649    | [C <sub>26</sub> H <sub>44</sub> O+H] <sup>+</sup>               | [M+H-CH <sub>4</sub> ] <sup>+</sup>                  |
| 371.36723 | 45.58                 | 371.36723    | [C <sub>27</sub> H <sub>46</sub> +H] <sup>+</sup>                | [M+H-H <sub>2</sub> O] <sup>+</sup>                  |
| 355.33593 | 32.43                 | 355.33593    | [C <sub>26</sub> H <sub>42</sub> +H] <sup>+</sup>                | [M+H-CH <sub>4</sub> -H <sub>2</sub> O] <sup>+</sup> |
| 177.16385 | 30.21                 | 177.16378    | [C <sub>13</sub> H <sub>20</sub> +H] <sup>+</sup>                | Solvent background ion                               |
| 370.35941 | 26.19                 | 370.3594     | [C <sub>27</sub> H <sub>46</sub> ] <sup>•+</sup>                 | [M-H <sub>2</sub> O] <sup>•+</sup>                   |
| 387.36213 | 10.65                 | 387.36214    | [C <sub>27</sub> H <sub>46</sub> O+H] <sup>+</sup>               | [M+H-H <sub>2</sub> ] <sup>+</sup>                   |
| 369.35159 | 6.76                  | 369.35158    | [C <sub>27</sub> H <sub>44</sub> +H] <sup>+</sup>                | [M+H-H <sub>2</sub> O-H <sub>2</sub> ] <sup>+</sup>  |
| 215.17950 | 6.23                  | 215.17943    | [C <sub>16</sub> H <sub>22</sub> +H] <sup>+</sup>                |                                                      |
| 435.38326 | 5.80                  | 435.38327    | [C <sub>28</sub> H <sub>50</sub> O <sub>3</sub> +H] <sup>+</sup> | Unknown                                              |
| 461.41400 | 4.17                  | 461.41418    | [C <sub>34</sub> H <sub>52</sub> +H] <sup>+</sup>                | Unknown                                              |
| 383.36726 | 3.66                  | 383.36723    | [C <sub>28</sub> H <sub>46</sub> +H] <sup>+</sup>                | Unknown                                              |
| 403.35702 | 3.58                  | 403.35706    | [C <sub>27</sub> H <sub>46</sub> O <sub>2</sub> +H] <sup>+</sup> | [M+H+O-H <sub>2</sub> ] <sup>+</sup>                 |
| 464.43764 | 3.43                  | 464.43765    | [C <sub>34</sub> H <sub>56</sub> ] <sup>•+</sup>                 | Unknown                                              |
| 385.34649 | 3.26                  | 385.34649    | [C <sub>27</sub> H <sub>44</sub> O+H] <sup>+</sup>               | [M+H-4H] <sup>+</sup>                                |
| 421.36758 | 2.54                  | 421.36762    | [C <sub>27</sub> H <sub>48</sub> O <sub>3</sub> +H] <sup>+</sup> | [M+H+O <sub>2</sub> ] <sup>+</sup>                   |
| 493.40377 | 2.30                  | 493.40401    | [C <sub>34</sub> H <sub>52</sub> O <sub>2</sub> +H] <sup>+</sup> | Unknown                                              |
| 386.35432 | 2.17                  | 386.35432    | [C <sub>27</sub> H <sub>46</sub> O] <sup>•+</sup>                | [M-H <sub>2</sub> ] <sup>•+</sup>                    |
| 233.19007 | 2.03                  | 233.18999    | [C <sub>16</sub> H <sub>24</sub> O+H] <sup>+</sup>               |                                                      |
| 331.29951 | 2.00                  | 331.29954    | [C <sub>23</sub> H <sub>38</sub> O+H] <sup>+</sup>               |                                                      |
| 400.37001 | 1.99                  | 400.36997    | [C <sub>28</sub> H <sub>48</sub> O] <sup>•+</sup>                | Unknown                                              |
| 417.37267 | 1.96                  | 417.37271    | [C <sub>28</sub> H <sub>48</sub> O <sub>2</sub> +H] <sup>+</sup> | Unknown                                              |
| 288.28119 | 1.77                  | 288.28115    | [C <sub>21</sub> H <sub>36</sub> ] <sup>•+</sup>                 |                                                      |
| 199.11180 | 1.75                  | 199.11174    | [C <sub>14</sub> H <sub>14</sub> O+H] <sup>+</sup>               | Solvent background ion                               |
| 462.42185 | 1.69                  | 462.422      | [C <sub>34</sub> H <sub>54</sub> ] <sup>•+</sup>                 | Unknown                                              |
| 479.38806 | 1.62                  | 479.38836    | [C <sub>33</sub> H <sub>50</sub> O <sub>2</sub> +H] <sup>+</sup> | Unknown                                              |
| 402.38572 | 1.53                  | 402.38562    | [C <sub>28</sub> H <sub>50</sub> O] <sup>•+</sup>                | Unknown                                              |
| 447.39862 | 1.51                  | 447.39853    | [C <sub>33</sub> H <sub>50</sub> +H] <sup>+</sup>                | Unknown                                              |
| 429.40930 | 1.50                  | 429.40909    | [C <sub>30</sub> H <sub>52</sub> O+H] <sup>+</sup>               | Unknown                                              |
| 201.16386 | 1.39                  | 201.16378    | [C <sub>15</sub> H <sub>20</sub> +H] <sup>+</sup>                |                                                      |
| 185.13256 | 1.25                  | 185.13248    | [C <sub>14</sub> H <sub>16</sub> +H] <sup>+</sup>                | Solvent background ion                               |
| 198.10399 | 1.21                  | 198.10392    | [C <sub>14</sub> H <sub>14</sub> O] <sup>•+</sup>                | Solvent background ion                               |
| 445.40414 | 1.15                  | 445.40401    | [C <sub>30</sub> H <sub>52</sub> O <sub>2</sub> +H] <sup>+</sup> | Unknown                                              |
| 367.33592 | 1.13                  | 367.33593    | [C <sub>27</sub> H <sub>42</sub> +H] <sup>+</sup>                |                                                      |
| 219.21082 | 1.09                  | 219.21073    | [C <sub>16</sub> H <sub>26</sub> +H] <sup>+</sup>                | Contaminant                                          |
| 183.11693 | 1.00                  | 183.11683    | [C <sub>14</sub> H <sub>14</sub> +H] <sup>+</sup>                | Solvent background ion                               |



Table S.9. Cholesterol monoisotopic ions detected via broadband APPI-FTICR MS (in propanol and toluene), with a relative intensity > 1%.

| Peak m/z  | Relative intensity, % | Assigned m/z | Ion formula                                        | Interpretation                                       |
|-----------|-----------------------|--------------|----------------------------------------------------|------------------------------------------------------|
| 388.36997 | 100.00                | 388.369968   | [C <sub>27</sub> H <sub>48</sub> O] <sup>•+</sup>  | [M] <sup>•+</sup>                                    |
| 371.36723 | 19.49                 | 371.367228   | [C <sub>27</sub> H <sub>46</sub> +H] <sup>+</sup>  | [M+H-H <sub>2</sub> O] <sup>+</sup>                  |
| 373.34649 | 11.12                 | 373.346492   | [C <sub>26</sub> H <sub>44</sub> O+H] <sup>+</sup> | [M+H-CH <sub>4</sub> ] <sup>+</sup>                  |
| 387.36214 | 6.24                  | 387.362143   | [C <sub>27</sub> H <sub>46</sub> O+H] <sup>+</sup> | [M+H-H <sub>2</sub> ] <sup>+</sup>                   |
| 355.33593 | 4.02                  | 355.335928   | [C <sub>26</sub> H <sub>42</sub> +H] <sup>+</sup>  | [M+H-CH <sub>4</sub> -H <sub>2</sub> O] <sup>+</sup> |
| 370.35940 | 2.28                  | 370.359403   | [C <sub>27</sub> H <sub>46</sub> ] <sup>•+</sup>   | [M-H <sub>2</sub> O] <sup>•+</sup>                   |
| 177.16379 | 1.32                  | 177.163777   | [C <sub>13</sub> H <sub>20</sub> +H] <sup>+</sup>  | Solvent background ion                               |

Table S.10. 5 $\alpha$ -Sitostanol monoisotopic ions detected via broadband APPI-FTICR MS (in propanol and toluene), with a relative intensity > 1%.

| Peak m/z  | Relative intensity, % | Assigned m/z | Ion formula                                                      | Interpretation                                       |
|-----------|-----------------------|--------------|------------------------------------------------------------------|------------------------------------------------------|
| 416.40126 | 100.00                | 416.401268   | [C <sub>29</sub> H <sub>52</sub> O] <sup>•+</sup>                | [M] <sup>•+</sup>                                    |
| 399.39853 | 14.74                 | 399.398528   | [C <sub>29</sub> H <sub>50</sub> +H] <sup>+</sup>                | [M+H-H <sub>2</sub> O] <sup>+</sup>                  |
| 530.46924 | 12.08                 | 530.469347   | [C <sub>35</sub> H <sub>62</sub> O <sub>3</sub> ] <sup>•+</sup>  | Contaminant                                          |
| 401.37780 | 10.10                 | 401.377793   | [C <sub>28</sub> H <sub>48</sub> O+H] <sup>+</sup>               | [M+H-CH <sub>4</sub> ] <sup>+</sup>                  |
| 415.39344 | 7.77                  | 415.393443   | [C <sub>29</sub> H <sub>50</sub> O+H] <sup>+</sup>               | [M+H-H <sub>2</sub> ] <sup>+</sup>                   |
| 177.16379 | 4.42                  | 177.163777   | [C <sub>13</sub> H <sub>20</sub> +H] <sup>+</sup>                | Solvent background ion                               |
| 383.36723 | 4.04                  | 383.367228   | [C <sub>28</sub> H <sub>46</sub> +H] <sup>+</sup>                | [M+H-CH <sub>4</sub> -H <sub>2</sub> O] <sup>+</sup> |
| 447.34686 | 3.05                  | 447.346886   | [C <sub>28</sub> H <sub>46</sub> O <sub>4</sub> +H] <sup>+</sup> | Contaminant                                          |
| 398.39072 | 2.78                  | 398.390703   | [C <sub>29</sub> H <sub>50</sub> ] <sup>•+</sup>                 | [M-H <sub>2</sub> O] <sup>•+</sup>                   |
| 402.38562 | 2.48                  | 402.385618   | [C <sub>28</sub> H <sub>50</sub> O] <sup>•+</sup>                |                                                      |
| 413.37778 | 1.55                  | 413.377793   | [C <sub>29</sub> H <sub>48</sub> O+H] <sup>+</sup>               |                                                      |
| 474.40667 | 1.27                  | 474.406747   | [C <sub>31</sub> H <sub>54</sub> O <sub>3</sub> ] <sup>•+</sup>  | Contaminant                                          |
| 397.38287 | 1.08                  | 397.382878   | [C <sub>29</sub> H <sub>48</sub> +H] <sup>+</sup>                |                                                      |
| 414.38563 | 1.00                  | 414.385618   | [C <sub>29</sub> H <sub>50</sub> O] <sup>•+</sup>                |                                                      |

Table S.11: Ion formula assignments for the standard cholesterol CID spectrum. Interpretations marked\* are based on work by West and Reid<sup>2</sup>.

| Cholesterol standard fragmentation mass spectrum |                |              |                                                  |                  | Interpretation                                              | Detected in Kawangware CID spectrum, for isolation at m/z 386.35? (rel. inten., %) |
|--------------------------------------------------|----------------|--------------|--------------------------------------------------|------------------|-------------------------------------------------------------|------------------------------------------------------------------------------------|
| Peak m/z                                         | Rel. inten., % | Assigned m/z | Ion formula (simplified)                         | Electron species |                                                             |                                                                                    |
| 386.35435                                        | 100.00         | 386.354318   | [C <sub>27</sub> H <sub>46</sub> O] <sup>+</sup> | Odd              | [M] <sup>+</sup> *                                          | Y (37.41)                                                                          |
| 231.17433                                        | 72.49          | 231.174342   | [C <sub>16</sub> H <sub>23</sub> O] <sup>+</sup> | Even             | C <sub>11</sub> H <sub>23</sub> loss*                       | Y (79.02)                                                                          |
| 301.28897                                        | 64.66          | 301.288978   | [C <sub>22</sub> H <sub>37</sub> ] <sup>+</sup>  | Even             | C <sub>5</sub> H <sub>9</sub> O loss*                       | Y (29.73)                                                                          |
| 371.33086                                        | 56.45          | 371.330842   | [C <sub>26</sub> H <sub>43</sub> O] <sup>+</sup> | Even             | CH <sub>3</sub> loss*                                       | Y (85.56)                                                                          |
| 368.34376                                        | 35.53          | 368.343753   | [C <sub>27</sub> H <sub>44</sub> ] <sup>+</sup>  | Odd              | H <sub>2</sub> O loss*                                      | Y (12.03)                                                                          |
| 213.16377                                        | 23.39          | 213.163777   | [C <sub>16</sub> H <sub>21</sub> ] <sup>+</sup>  | Even             | H <sub>2</sub> O and C <sub>11</sub> H <sub>23</sub> losses | Y (59.02)                                                                          |
| 353.32027                                        | 21.43          | 353.320278   | [C <sub>26</sub> H <sub>41</sub> ] <sup>+</sup>  | Even             | H <sub>2</sub> O and CH <sub>3</sub> losses                 | Y (35.38)                                                                          |
| 255.21072                                        | 21.23          | 255.210727   | [C <sub>19</sub> H <sub>27</sub> ] <sup>+</sup>  | Even             | H <sub>2</sub> O and C <sub>8</sub> H <sub>17</sub> loss*   | Y (14.85)                                                                          |
| 273.22129                                        | 20.29          | 273.221292   | [C <sub>19</sub> H <sub>29</sub> O] <sup>+</sup> | Even             | C <sub>8</sub> H <sub>17</sub> loss*                        | Y (14.94)                                                                          |
| 229.19507                                        | 13.65          | 229.195077   | [C <sub>17</sub> H <sub>25</sub> ] <sup>+</sup>  | Even             | C <sub>10</sub> H <sub>21</sub> O loss*                     | Y (14.65)                                                                          |
| 326.29680                                        | 13.34          | 326.296803   | [C <sub>24</sub> H <sub>38</sub> ] <sup>+</sup>  | Odd              |                                                             | Y (5.53)                                                                           |
| 246.19781                                        | 13.02          | 246.197817   | [C <sub>17</sub> H <sub>26</sub> O] <sup>+</sup> | Odd              |                                                             | Y (20.81)                                                                          |
| 228.18724                                        | 13.01          | 228.187252   | [C <sub>17</sub> H <sub>24</sub> ] <sup>+</sup>  | Odd              |                                                             | Y (9.66)                                                                           |
| 343.29953                                        | 8.99           | 343.299542   | [C <sub>24</sub> H <sub>39</sub> O] <sup>+</sup> | Even             |                                                             | N                                                                                  |
| 178.13523                                        | 7.40           | 178.135217   | [C <sub>12</sub> H <sub>18</sub> O] <sup>+</sup> | Odd              |                                                             | N                                                                                  |
| 161.13249                                        | 7.29           | 161.132477   | [C <sub>12</sub> H <sub>17</sub> ] <sup>+</sup>  | Even             |                                                             | Y (19.99)                                                                          |
| 327.30463                                        | 7.25           | 327.304628   | [C <sub>24</sub> H <sub>39</sub> ] <sup>+</sup>  | Even             |                                                             | Y (13.02)                                                                          |
| 245.18998                                        | 6.93           | 245.189992   | [C <sub>17</sub> H <sub>25</sub> O] <sup>+</sup> | Even             |                                                             | Y (7.55)                                                                           |
| 227.17942                                        | 6.46           | 227.179427   | [C <sub>17</sub> H <sub>23</sub> ] <sup>+</sup>  | Even             |                                                             | Y (7.25)                                                                           |
| 300.28112                                        | 5.74           | 300.281153   | [C <sub>22</sub> H <sub>36</sub> ] <sup>+</sup>  | Odd              |                                                             | N                                                                                  |
| 232.18215                                        | 5.56           | 232.182167   | [C <sub>16</sub> H <sub>24</sub> O] <sup>+</sup> | Odd              |                                                             | Y (17.79)                                                                          |
| 313.28896                                        | 5.30           | 313.288978   | [C <sub>23</sub> H <sub>37</sub> ] <sup>+</sup>  | Even             |                                                             | N                                                                                  |
| 173.13249                                        | 5.01           | 173.132477   | [C <sub>13</sub> H <sub>17</sub> ] <sup>+</sup>  | Even             |                                                             | Y (8.37)                                                                           |
| 301.25257                                        | 4.80           | 301.252592   | [C <sub>21</sub> H <sub>33</sub> O] <sup>+</sup> | Even             |                                                             | N                                                                                  |
| 160.12467                                        | 4.57           | 160.124652   | [C <sub>12</sub> H <sub>16</sub> ] <sup>+</sup>  | Odd              |                                                             | N                                                                                  |
| 357.31526                                        | 4.51           | 357.315192   | [C <sub>25</sub> H <sub>41</sub> O] <sup>+</sup> | Even             |                                                             | N                                                                                  |
| 189.16378                                        | 4.28           | 189.163777   | [C <sub>14</sub> H <sub>21</sub> ] <sup>+</sup>  | Even             | C <sub>13</sub> H <sub>25</sub> O loss*                     | Y (8.65)                                                                           |
| 175.14814                                        | 3.96           | 175.148127   | [C <sub>13</sub> H <sub>19</sub> ] <sup>+</sup>  | Even             |                                                             | Y (8.57)                                                                           |
| 314.29681                                        | 3.96           | 314.296803   | [C <sub>23</sub> H <sub>38</sub> ] <sup>+</sup>  | Odd              |                                                             | Y (4.73)                                                                           |
| 159.11683                                        | 3.62           | 159.116827   | [C <sub>12</sub> H <sub>15</sub> ] <sup>+</sup>  | Even             |                                                             | Y (4.56)                                                                           |
| 163.14813                                        | 3.53           | 163.148127   | [C <sub>12</sub> H <sub>19</sub> ] <sup>+</sup>  | Even             |                                                             | Y (5.66)                                                                           |
| 199.14812                                        | 3.40           | 199.148127   | [C <sub>15</sub> H <sub>19</sub> ] <sup>+</sup>  | Even             | C <sub>12</sub> H <sub>25</sub> and H <sub>2</sub> O losses | Y (13.80)                                                                          |
| 325.28901                                        | 3.31           | 325.288978   | [C <sub>24</sub> H <sub>37</sub> ] <sup>+</sup>  | Even             |                                                             | Y (3.69)                                                                           |
| 187.14811                                        | 3.28           | 187.148127   | [C <sub>14</sub> H <sub>19</sub> ] <sup>+</sup>  | Even             |                                                             | Y (7.20)                                                                           |
| 339.30460                                        | 3.18           | 339.304628   | [C <sub>25</sub> H <sub>39</sub> ] <sup>+</sup>  | Even             |                                                             | N                                                                                  |

(Table S.11 continued...)

|           |      |            |                                                  |      |  |           |
|-----------|------|------------|--------------------------------------------------|------|--|-----------|
| 206.20288 | 3.09 | 206.202902 | [C <sub>15</sub> H <sub>26</sub> ] <sup>+</sup>  | Odd  |  | N         |
| 203.14301 | 3.04 | 203.143042 | [C <sub>14</sub> H <sub>19</sub> O] <sup>+</sup> | Even |  | Y (4.04)  |
| 145.10121 | 3.03 | 145.101177 | [C <sub>11</sub> H <sub>13</sub> ] <sup>+</sup>  | Even |  | N         |
| 214.17160 | 2.74 | 214.171602 | [C <sub>16</sub> H <sub>22</sub> ] <sup>+</sup>  | Odd  |  | Y (12.50) |
| 147.11684 | 2.72 | 147.116827 | [C <sub>11</sub> H <sub>15</sub> ] <sup>+</sup>  | Even |  | N         |
| 201.16377 | 2.54 | 201.163777 | [C <sub>15</sub> H <sub>21</sub> ] <sup>+</sup>  | Even |  | Y (11.87) |
| 299.27325 | 2.45 | 299.273328 | [C <sub>22</sub> H <sub>35</sub> ] <sup>+</sup>  | Even |  | N         |
| 260.21347 | 2.41 | 260.213467 | [C <sub>18</sub> H <sub>28</sub> O] <sup>+</sup> | Odd  |  | Y (5.42)  |
| 174.14030 | 2.36 | 174.140302 | [C <sub>13</sub> H <sub>18</sub> ] <sup>+</sup>  | Odd  |  | N         |
| 185.13248 | 2.18 | 185.132477 | [C <sub>14</sub> H <sub>17</sub> ] <sup>+</sup>  | Even |  | Y (9.81)  |
| 215.17938 | 2.18 | 215.179427 | [C <sub>16</sub> H <sub>23</sub> ] <sup>+</sup>  | Even |  | Y (12.67) |
| 316.31241 | 2.18 | 316.312453 | [C <sub>23</sub> H <sub>40</sub> ] <sup>+</sup>  | Odd  |  | Y (31.75) |
| 149.13251 | 2.11 | 149.132477 | [C <sub>11</sub> H <sub>17</sub> ] <sup>+</sup>  | Even |  | Y (2.90)  |
| 283.24201 | 2.07 | 283.242027 | [C <sub>21</sub> H <sub>31</sub> ] <sup>+</sup>  | Even |  | N         |
| 171.11688 | 2.05 | 171.116827 | [C <sub>13</sub> H <sub>15</sub> ] <sup>+</sup>  | Even |  | Y (4.19)  |
| 285.25783 | 1.98 | 285.257677 | [C <sub>21</sub> H <sub>33</sub> ] <sup>+</sup>  | Even |  | N         |
| 191.17945 | 1.95 | 191.179427 | [C <sub>14</sub> H <sub>23</sub> ] <sup>+</sup>  | Even |  | Y (5.35)  |
| 135.11683 | 1.89 | 135.116827 | [C <sub>10</sub> H <sub>15</sub> ] <sup>+</sup>  | Even |  | N         |
| 242.20286 | 1.77 | 242.202902 | [C <sub>18</sub> H <sub>26</sub> ] <sup>+</sup>  | Odd  |  | N         |
| 340.31251 | 1.74 | 340.312453 | [C <sub>25</sub> H <sub>40</sub> ] <sup>+</sup>  | Odd  |  | N         |
| 158.10902 | 1.73 | 158.109002 | [C <sub>12</sub> H <sub>14</sub> ] <sup>+</sup>  | Odd  |  | N         |
| 247.20563 | 1.72 | 247.205642 | [C <sub>17</sub> H <sub>27</sub> O] <sup>+</sup> | Even |  | N         |
| 200.15589 | 1.55 | 200.155952 | [C <sub>15</sub> H <sub>20</sub> ] <sup>+</sup>  | Odd  |  | N         |
| 164.11958 | 1.52 | 164.119567 | [C <sub>11</sub> H <sub>16</sub> O] <sup>+</sup> | Odd  |  | N         |
| 172.12469 | 1.50 | 172.124652 | [C <sub>13</sub> H <sub>16</sub> ] <sup>+</sup>  | Odd  |  | N         |

Table S.12: Ion formula assignments for the  $\beta$ -sitosterol CID spectrum.

| $\beta$ -sitosterol standard fragmentation mass spectrum |                |              |                                                  |                  | Interpretation                                              | Detected in Kawangware CID spectrum, for isolation at m/z 414.39? (rel. inten., %) |
|----------------------------------------------------------|----------------|--------------|--------------------------------------------------|------------------|-------------------------------------------------------------|------------------------------------------------------------------------------------|
| Peak m/z                                                 | Rel. inten., % | Assigned m/z | Ion formula (simplified)                         | Electron species |                                                             |                                                                                    |
| 213.16379                                                | 100.00         | 213.163777   | [C <sub>16</sub> H <sub>21</sub> ] <sup>+</sup>  | Even             | H <sub>2</sub> O and C <sub>13</sub> H <sub>27</sub> losses | Y (45.65)                                                                          |
| 231.17434                                                | 95.30          | 231.174342   | [C <sub>16</sub> H <sub>23</sub> O] <sup>+</sup> | Even             | C <sub>13</sub> H <sub>27</sub> loss                        | Y (43.32)                                                                          |
| 399.36217                                                | 59.23          | 399.362143   | [C <sub>28</sub> H <sub>47</sub> O] <sup>+</sup> | Even             | CH <sub>3</sub> loss                                        | Y (100)                                                                            |
| 329.32025                                                | 48.75          | 329.320278   | [C <sub>24</sub> H <sub>41</sub> ] <sup>+</sup>  | Even             | C <sub>5</sub> H <sub>9</sub> O loss                        | Y (7.50)                                                                           |
| 381.35160                                                | 29.20          | 381.351578   | [C <sub>28</sub> H <sub>45</sub> ] <sup>+</sup>  | Even             | H <sub>2</sub> O and CH <sub>3</sub> loss                   | Y (29.03)                                                                          |
| 255.21071                                                | 25.73          | 255.210727   | [C <sub>19</sub> H <sub>27</sub> ] <sup>+</sup>  | Even             | H <sub>2</sub> O and C <sub>10</sub> H <sub>21</sub> losses | Y (12.89)                                                                          |
| 273.22127                                                | 24.81          | 273.221292   | [C <sub>19</sub> H <sub>29</sub> O] <sup>+</sup> | Even             | C <sub>10</sub> H <sub>21</sub> loss                        | Y (9.71)                                                                           |
| 414.38566                                                | 22.85          | 414.385618   | [C <sub>29</sub> H <sub>50</sub> O] <sup>+</sup> | Odd              | [M] <sup>•+</sup>                                           | Y (14.67)                                                                          |
| 228.18727                                                | 20.74          | 228.187252   | [C <sub>17</sub> H <sub>24</sub> ] <sup>+</sup>  | Odd              |                                                             | Y (8.69)                                                                           |
| 396.37508                                                | 20.31          | 396.375053   | [C <sub>29</sub> H <sub>48</sub> ] <sup>+</sup>  | Odd              | H <sub>2</sub> O loss                                       | Y (4.47)                                                                           |
| 246.19779                                                | 19.80          | 246.197817   | [C <sub>17</sub> H <sub>26</sub> O] <sup>+</sup> | Odd              |                                                             | Y (19.30)                                                                          |
| 245.18997                                                | 15.44          | 245.189992   | [C <sub>17</sub> H <sub>25</sub> O] <sup>+</sup> | Even             |                                                             | Y (3.09)                                                                           |
| 229.19508                                                | 15.16          | 229.195077   | [C <sub>17</sub> H <sub>25</sub> ] <sup>+</sup>  | Even             |                                                             | Y (10.75)                                                                          |
| 227.17944                                                | 14.78          | 227.179427   | [C <sub>17</sub> H <sub>23</sub> ] <sup>+</sup>  | Even             |                                                             | Y (7.89)                                                                           |
| 354.32808                                                | 13.14          | 354.328103   | [C <sub>26</sub> H <sub>42</sub> ] <sup>+</sup>  | Odd              |                                                             | N                                                                                  |
| 355.33593                                                | 10.65          | 355.335928   | [C <sub>26</sub> H <sub>43</sub> ] <sup>+</sup>  | Even             |                                                             | Y (15.41)                                                                          |
| 203.14305                                                | 10.28          | 203.143042   | [C <sub>14</sub> H <sub>19</sub> O] <sup>+</sup> | Even             |                                                             | Y (3.94)                                                                           |
| 185.13250                                                | 8.94           | 185.132477   | [C <sub>14</sub> H <sub>17</sub> ] <sup>+</sup>  | Even             |                                                             | Y (4.14)                                                                           |
| 178.13524                                                | 8.92           | 178.135217   | [C <sub>12</sub> H <sub>18</sub> O] <sup>+</sup> | Odd              |                                                             | N                                                                                  |
| 214.17161                                                | 8.79           | 214.171602   | [C <sub>16</sub> H <sub>22</sub> ] <sup>+</sup>  | Odd              |                                                             | Y (5.58)                                                                           |
| 187.14815                                                | 8.35           | 187.148127   | [C <sub>14</sub> H <sub>19</sub> ] <sup>+</sup>  | Even             |                                                             | Y (7.22)                                                                           |
| 173.13250                                                | 8.23           | 173.132477   | [C <sub>13</sub> H <sub>17</sub> ] <sup>+</sup>  | Even             |                                                             | Y (7.98)                                                                           |
| 215.17943                                                | 8.08           | 215.179427   | [C <sub>16</sub> H <sub>23</sub> ] <sup>+</sup>  | Even             | C <sub>13</sub> H <sub>25</sub> and H <sub>2</sub> O losses | Y (5.32)                                                                           |
| 161.13250                                                | 8.07           | 161.132477   | [C <sub>12</sub> H <sub>17</sub> ] <sup>+</sup>  | Even             |                                                             | Y (10.50)                                                                          |
| 199.14816                                                | 7.59           | 199.148127   | [C <sub>15</sub> H <sub>19</sub> ] <sup>+</sup>  | Even             | C <sub>14</sub> H <sub>29</sub> and H <sub>2</sub> O losses | Y (11.23)                                                                          |
| 201.16381                                                | 7.37           | 201.163777   | [C <sub>15</sub> H <sub>21</sub> ] <sup>+</sup>  | Even             | C <sub>14</sub> H <sub>27</sub> and H <sub>2</sub> O losses | Y (7.36)                                                                           |
| 175.14816                                                | 7.06           | 175.148127   | [C <sub>13</sub> H <sub>19</sub> ] <sup>+</sup>  | Even             |                                                             | Y (4.91)                                                                           |
| 189.16381                                                | 6.91           | 189.163777   | [C <sub>14</sub> H <sub>21</sub> ] <sup>+</sup>  | Even             |                                                             | Y (6.00)                                                                           |
| 203.17943                                                | 6.56           | 203.179427   | [C <sub>15</sub> H <sub>23</sub> ] <sup>+</sup>  | Even             |                                                             | Y (7.48)                                                                           |
| 371.33080                                                | 6.56           | 371.330842   | [C <sub>26</sub> H <sub>43</sub> O] <sup>+</sup> | Even             |                                                             | N                                                                                  |
| 232.18217                                                | 5.95           | 232.182167   | [C <sub>16</sub> H <sub>24</sub> O] <sup>+</sup> | Odd              |                                                             | Y (5.41)                                                                           |
| 328.31237                                                | 5.53           | 328.312453   | [C <sub>24</sub> H <sub>40</sub> ] <sup>+</sup>  | Odd              |                                                             | N                                                                                  |
| 341.32029                                                | 5.15           | 341.320278   | [C <sub>25</sub> H <sub>41</sub> ] <sup>+</sup>  | Even             |                                                             | N                                                                                  |
| 159.11685                                                | 4.65           | 159.116827   | [C <sub>12</sub> H <sub>15</sub> ] <sup>+</sup>  | Even             |                                                             | Y (4.93)                                                                           |
| 342.32803                                                | 4.59           | 342.328103   | [C <sub>25</sub> H <sub>42</sub> ] <sup>+</sup>  | Odd              |                                                             | Y (3.51)                                                                           |

(Table S.12 continued...)

|           |      |            |                                                  |      |                                      |          |
|-----------|------|------------|--------------------------------------------------|------|--------------------------------------|----------|
| 353.32032 | 4.56 | 353.320278 | [C <sub>26</sub> H <sub>41</sub> ] <sup>+</sup>  | Even |                                      | N        |
| 217.19508 | 4.36 | 217.195077 | [C <sub>16</sub> H <sub>25</sub> ] <sup>+</sup>  | Even |                                      | Y (3.87) |
| 241.19506 | 3.81 | 241.195077 | [C <sub>18</sub> H <sub>25</sub> ] <sup>+</sup>  | Even |                                      | Y (4.18) |
| 171.11685 | 3.79 | 171.116827 | [C <sub>13</sub> H <sub>15</sub> ] <sup>+</sup>  | Even |                                      | Y (6.24) |
| 186.14033 | 3.75 | 186.140302 | [C <sub>14</sub> H <sub>18</sub> ] <sup>+</sup>  | Odd  |                                      | N        |
| 231.21073 | 3.42 | 231.210727 | [C <sub>17</sub> H <sub>27</sub> ] <sup>+</sup>  | Even |                                      | Y (2.69) |
| 260.21343 | 3.17 | 260.213467 | [C <sub>18</sub> H <sub>28</sub> O] <sup>+</sup> | Odd  |                                      | N        |
| 339.30467 | 2.83 | 339.304628 | [C <sub>25</sub> H <sub>39</sub> ] <sup>+</sup>  | Even |                                      | Y (2.77) |
| 217.15870 | 2.71 | 217.158692 | [C <sub>15</sub> H <sub>21</sub> O] <sup>+</sup> | Even | C <sub>14</sub> H <sub>29</sub> loss | Y (5.65) |

Table S.13: Ion formula assignments for the stigmasterol CID spectrum.

| Stigmasterol standard fragmentation mass spectrum |                |              |                                                  |                  | Interpretation                                              | Detected in Kawangware CID spectrum, for isolation at m/z 412.37? (rel. inten., %) |
|---------------------------------------------------|----------------|--------------|--------------------------------------------------|------------------|-------------------------------------------------------------|------------------------------------------------------------------------------------|
| Peak m/z                                          | Rel. inten., % | Assigned m/z | Ion formula (simplified)                         | Electron species |                                                             |                                                                                    |
| 211.14812                                         | 100.00         | 211.148127   | [C <sub>16</sub> H <sub>19</sub> ] <sup>+</sup>  | Even             | C <sub>13</sub> H <sub>29</sub> O loss                      | Y (37.10)                                                                          |
| 379.33593                                         | 78.42          | 379.335928   | [C <sub>28</sub> H <sub>43</sub> ] <sup>+</sup>  | Even             | H <sub>2</sub> O and CH <sub>3</sub> losses                 | Y (45.73)                                                                          |
| 225.16377                                         | 45.36          | 225.163777   | [C <sub>17</sub> H <sub>21</sub> ] <sup>+</sup>  | Even             | C <sub>12</sub> H <sub>27</sub> O loss                      | Y (13.23)                                                                          |
| 226.17159                                         | 40.11          | 226.171602   | [C <sub>17</sub> H <sub>22</sub> ] <sup>+</sup>  | Odd              | C <sub>12</sub> H <sub>26</sub> O loss                      | Y (13.27)                                                                          |
| 197.13248                                         | 32.04          | 197.132477   | [C <sub>15</sub> H <sub>17</sub> ] <sup>+</sup>  | Even             | C <sub>14</sub> H <sub>31</sub> O loss                      | Y (13.92)                                                                          |
| 239.17941                                         | 23.55          | 239.179427   | [C <sub>18</sub> H <sub>23</sub> ] <sup>+</sup>  | Even             |                                                             | Y (8.88)                                                                           |
| 185.13248                                         | 22.37          | 185.132477   | [C <sub>14</sub> H <sub>17</sub> ] <sup>+</sup>  | Even             |                                                             | Y (12.73)                                                                          |
| 253.19506                                         | 22.01          | 253.195077   | [C <sub>19</sub> H <sub>25</sub> ] <sup>+</sup>  | Even             | C <sub>10</sub> H <sub>21</sub> and H <sub>2</sub> O losses | Y (13.65)                                                                          |
| 169.10118                                         | 21.49          | 169.101177   | [C <sub>13</sub> H <sub>13</sub> ] <sup>+</sup>  | Even             |                                                             | Y (5.51)                                                                           |
| 199.14812                                         | 16.13          | 199.148127   | [C <sub>15</sub> H <sub>19</sub> ] <sup>+</sup>  | Even             | C <sub>14</sub> H <sub>27</sub> and H <sub>2</sub> O losses | Y (10.54)                                                                          |
| 227.17941                                         | 13.88          | 227.179427   | [C <sub>17</sub> H <sub>23</sub> ] <sup>+</sup>  | Even             |                                                             | Y (8.54)                                                                           |
| 271.20562                                         | 13.53          | 271.205642   | [C <sub>19</sub> H <sub>27</sub> O] <sup>+</sup> | Even             | C <sub>10</sub> H <sub>21</sub> loss                        | Y (37.65)                                                                          |
| 213.16377                                         | 13.26          | 213.163777   | [C <sub>16</sub> H <sub>21</sub> ] <sup>+</sup>  | Even             | H <sub>2</sub> O and C <sub>13</sub> H <sub>25</sub> losses | Y (15.20)                                                                          |
| 183.11683                                         | 13.11          | 183.116827   | [C <sub>14</sub> H <sub>15</sub> ] <sup>+</sup>  | Even             |                                                             | Y (5.91)                                                                           |
| 229.15868                                         | 12.50          | 229.158692   | [C <sub>16</sub> H <sub>21</sub> O] <sup>+</sup> | Even             |                                                             | Y (10.27)                                                                          |
| 171.11683                                         | 11.41          | 171.116827   | [C <sub>13</sub> H <sub>15</sub> ] <sup>+</sup>  | Even             |                                                             | Y (9.32)                                                                           |
| 244.18215                                         | 10.21          | 244.182167   | [C <sub>17</sub> H <sub>24</sub> O] <sup>+</sup> | Odd              |                                                             | N                                                                                  |
| 394.35942                                         | 9.44           | 394.359402   | [C <sub>29</sub> H <sub>46</sub> ] <sup>+</sup>  | Odd              | H <sub>2</sub> O loss                                       | Y (13.63)                                                                          |
| 397.34651                                         | 8.68           | 397.346492   | [C <sub>28</sub> H <sub>45</sub> O] <sup>+</sup> | Even             | CH <sub>3</sub> loss                                        | Y (32.25)                                                                          |
| 198.14030                                         | 8.60           | 198.140302   | [C <sub>15</sub> H <sub>18</sub> ] <sup>+</sup>  | Odd              |                                                             | N                                                                                  |
| 186.14030                                         | 8.47           | 186.140302   | [C <sub>14</sub> H <sub>18</sub> ] <sup>+</sup>  | Odd              |                                                             | Y (5.80)                                                                           |
| 245.18997                                         | 6.36           | 245.189992   | [C <sub>17</sub> H <sub>25</sub> O] <sup>+</sup> | Even             |                                                             | Y (6.37)                                                                           |
| 212.15594                                         | 6.01           | 212.155952   | [C <sub>16</sub> H <sub>20</sub> ] <sup>+</sup>  | Odd              |                                                             | N                                                                                  |
| 295.24200                                         | 5.79           | 295.242027   | [C <sub>22</sub> H <sub>31</sub> ] <sup>+</sup>  | Even             |                                                             | N                                                                                  |
| 184.12465                                         | 5.69           | 184.124652   | [C <sub>14</sub> H <sub>16</sub> ] <sup>+</sup>  | Odd              |                                                             | N                                                                                  |
| 281.22636                                         | 5.07           | 281.226377   | [C <sub>21</sub> H <sub>29</sub> ] <sup>+</sup>  | Even             |                                                             | N                                                                                  |
| 412.36998                                         | 4.94           | 412.369968   | [C <sub>29</sub> H <sub>48</sub> O] <sup>+</sup> | Odd              | [M] <sup>•+</sup>                                           | Y (89.44)                                                                          |
| 243.17432                                         | 4.80           | 243.174342   | [C <sub>17</sub> H <sub>23</sub> O] <sup>+</sup> | Even             |                                                             | N                                                                                  |
| 272.21342                                         | 3.76           | 272.213467   | [C <sub>19</sub> H <sub>28</sub> O] <sup>+</sup> | Odd              |                                                             | N                                                                                  |
| 173.13249                                         | 3.61           | 173.132477   | [C <sub>13</sub> H <sub>17</sub> ] <sup>+</sup>  | Even             |                                                             | Y (6.82)                                                                           |
| 157.10119                                         | 3.37           | 157.101177   | [C <sub>12</sub> H <sub>13</sub> ] <sup>+</sup>  | Even             |                                                             | N                                                                                  |
| 155.08554                                         | 3.25           | 155.085527   | [C <sub>12</sub> H <sub>11</sub> ] <sup>+</sup>  | Even             |                                                             | N                                                                                  |
| 161.13249                                         | 3.09           | 161.132477   | [C <sub>12</sub> H <sub>17</sub> ] <sup>+</sup>  | Even             |                                                             | Y (8.54)                                                                           |
| 187.14813                                         | 3.04           | 187.148127   | [C <sub>14</sub> H <sub>19</sub> ] <sup>+</sup>  | Even             |                                                             | Y (6.74)                                                                           |
| 255.21071                                         | 3.04           | 255.210727   | [C <sub>19</sub> H <sub>27</sub> ] <sup>+</sup>  | Even             | H <sub>2</sub> O and C <sub>10</sub> H <sub>19</sub> losses | Y (5.63)                                                                           |

(Table S.13 continued...)

|           |      |            |                                                  |      |                                                             |           |
|-----------|------|------------|--------------------------------------------------|------|-------------------------------------------------------------|-----------|
| 257.18999 | 3.01 | 257.189992 | [C <sub>18</sub> H <sub>25</sub> O] <sup>+</sup> | Even |                                                             | Y (6.62)  |
| 159.11683 | 2.92 | 159.116827 | [C <sub>12</sub> H <sub>15</sub> ] <sup>+</sup>  | Even |                                                             | Y (5.73)  |
| 231.17433 | 2.76 | 231.174342 | [C <sub>16</sub> H <sub>23</sub> O] <sup>+</sup> | Even | C <sub>13</sub> H <sub>25</sub> loss                        | Y (8.42)  |
| 258.19780 | 2.62 | 258.197817 | [C <sub>18</sub> H <sub>26</sub> O] <sup>+</sup> | Odd  |                                                             | N         |
| 214.17160 | 2.44 | 214.171602 | [C <sub>16</sub> H <sub>22</sub> ] <sup>+</sup>  | Odd  |                                                             | N         |
| 172.12465 | 2.30 | 172.124652 | [C <sub>13</sub> H <sub>16</sub> ] <sup>+</sup>  | Odd  |                                                             | N         |
| 217.15870 | 2.26 | 217.158692 | [C <sub>15</sub> H <sub>21</sub> O] <sup>+</sup> | Even | C <sub>14</sub> H <sub>27</sub> loss                        | N         |
| 215.14304 | 2.20 | 215.143042 | [C <sub>15</sub> H <sub>19</sub> O] <sup>+</sup> | Even |                                                             | N         |
| 201.16377 | 2.16 | 201.163777 | [C <sub>15</sub> H <sub>21</sub> ] <sup>+</sup>  | Even | C <sub>14</sub> H <sub>25</sub> and H <sub>2</sub> O losses | Y (11.08) |
| 170.10901 | 2.14 | 170.109002 | [C <sub>13</sub> H <sub>14</sub> ] <sup>+</sup>  | Odd  |                                                             | N         |
| 241.19505 | 2.02 | 241.195077 | [C <sub>18</sub> H <sub>25</sub> ] <sup>+</sup>  | Even |                                                             | N         |
| 326.29664 | 1.97 | 326.296802 | [C <sub>24</sub> H <sub>38</sub> ] <sup>+</sup>  | Odd  |                                                             | N         |
| 240.18723 | 1.92 | 240.187252 | [C <sub>18</sub> H <sub>24</sub> ] <sup>+</sup>  | Odd  |                                                             | N         |
| 174.14031 | 1.81 | 174.140302 | [C <sub>13</sub> H <sub>18</sub> ] <sup>+</sup>  | Odd  |                                                             | N         |
| 327.30460 | 1.75 | 327.304627 | [C <sub>24</sub> H <sub>39</sub> ] <sup>+</sup>  | Even | C <sub>5</sub> H <sub>9</sub> O loss                        | N         |
| 158.10903 | 1.66 | 158.109002 | [C <sub>12</sub> H <sub>14</sub> ] <sup>+</sup>  | Odd  |                                                             | N         |
| 349.28902 | 1.65 | 349.288978 | [C <sub>26</sub> H <sub>37</sub> ] <sup>+</sup>  | Even |                                                             | N         |
| 201.12741 | 1.59 | 201.127392 | [C <sub>14</sub> H <sub>17</sub> O] <sup>+</sup> | Even |                                                             | N         |
| 229.19508 | 1.47 | 229.195077 | [C <sub>17</sub> H <sub>25</sub> ] <sup>+</sup>  | Even |                                                             | N         |
| 187.11174 | 1.46 | 187.111742 | [C <sub>13</sub> H <sub>15</sub> O] <sup>+</sup> | Even |                                                             | N         |
| 353.32029 | 1.43 | 353.320278 | [C <sub>26</sub> H <sub>41</sub> ] <sup>+</sup>  | Even |                                                             | N         |
| 200.15595 | 1.42 | 200.155952 | [C <sub>15</sub> H <sub>20</sub> ] <sup>+</sup>  | Odd  |                                                             | N         |

Table S.14: Ion formula assignments for the coprostanol CID spectrum.

| Coprostanol standard fragmentation mass spectrum |                |              |                                                  |                  | Interpretation                                              | Detected in Kawangware CID spectrum, for isolation at m/z 388.37? (rel. inten., %) |
|--------------------------------------------------|----------------|--------------|--------------------------------------------------|------------------|-------------------------------------------------------------|------------------------------------------------------------------------------------|
| Peak m/z                                         | Rel. inten., % | Assigned m/z | Ion formula (simplified)                         | Electron species |                                                             |                                                                                    |
| 373.34647                                        | 54.13          | 373.346492   | [C <sub>26</sub> H <sub>45</sub> O] <sup>+</sup> | Even             | CH <sub>3</sub> loss                                        | Y (100.00)                                                                         |
| 233.18998                                        | 29.99          | 233.189992   | [C <sub>16</sub> H <sub>25</sub> O] <sup>+</sup> | Even             | C <sub>11</sub> H <sub>23</sub> loss                        | Y (53.25)                                                                          |
| 388.36999                                        | 15.01          | 388.369968   | [C <sub>27</sub> H <sub>48</sub> O] <sup>+</sup> | Odd              | [M] <sup>*+</sup>                                           | Y (21.81)                                                                          |
| 355.33591                                        | 8.89           | 355.335928   | [C <sub>26</sub> H <sub>43</sub> ] <sup>+</sup>  | Even             | H <sub>2</sub> O and CH <sub>3</sub> losses                 | Y (23.80)                                                                          |
| 215.17943                                        | 8.68           | 215.179427   | [C <sub>16</sub> H <sub>23</sub> ] <sup>+</sup>  | Even             | H <sub>2</sub> O and C <sub>11</sub> H <sub>23</sub> losses | Y (30.44)                                                                          |
| 262.26545                                        | 6.65           | 262.265503   | [C <sub>19</sub> H <sub>34</sub> ] <sup>+</sup>  | Odd              | C <sub>8</sub> H <sub>14</sub> O loss                       | Y (9.51)                                                                           |
| 288.28112                                        | 3.08           | 288.281153   | [C <sub>21</sub> H <sub>36</sub> ] <sup>+</sup>  | Odd              | C <sub>6</sub> H <sub>12</sub> O loss                       | Y (5.87)                                                                           |
| 370.35951                                        | 2.84           | 370.359403   | [C <sub>27</sub> H <sub>46</sub> ] <sup>+</sup>  | Odd              | [M-H <sub>2</sub> O] <sup>*+</sup>                          | Y (8.69)                                                                           |
| 201.16376                                        | 1.69           | 201.163777   | [C <sub>15</sub> H <sub>21</sub> ] <sup>+</sup>  | Even             | C <sub>12</sub> H <sub>27</sub> O loss                      | Y (2.77)                                                                           |

Table S.15: Ion formula assignments for the cholestanol CID spectrum. The m/z values marked \* were also detected in the coprostanol CID spectrum.

| Cholestanol standard fragmentation mass spectrum |                |              |                                                  |                  | Interpretation                                              | Detected in Kawangware CID spectrum, for isolation at m/z 388.37? (rel. inten., %) |
|--------------------------------------------------|----------------|--------------|--------------------------------------------------|------------------|-------------------------------------------------------------|------------------------------------------------------------------------------------|
| Peak m/z                                         | Rel. inten., % | Assigned m/z | Ion formula (simplified)                         | Electron species |                                                             |                                                                                    |
| 373.34649                                        | 100.00         | 373.346492*  | [C <sub>26</sub> H <sub>45</sub> O] <sup>+</sup> | Even             | CH <sub>3</sub> loss                                        | Y (100.00)                                                                         |
| 233.19000                                        | 84.37          | 233.189992*  | [C <sub>16</sub> H <sub>25</sub> O] <sup>+</sup> | Even             | C <sub>11</sub> H <sub>23</sub> loss                        | Y (53.25)                                                                          |
| 215.17944                                        | 59.50          | 215.179427*  | [C <sub>16</sub> H <sub>23</sub> ] <sup>+</sup>  | Even             | H <sub>2</sub> O and C <sub>11</sub> H <sub>23</sub> losses | Y (30.44)                                                                          |
| 262.26548                                        | 32.67          | 262.265503*  | [C <sub>19</sub> H <sub>34</sub> ] <sup>+</sup>  | Odd              | C <sub>8</sub> H <sub>14</sub> O loss                       | Y (9.51)                                                                           |
| 388.36999                                        | 27.24          | 388.369968*  | [C <sub>27</sub> H <sub>48</sub> O] <sup>+</sup> | Odd              | [M] <sup>•+</sup>                                           | Y (21.81)                                                                          |
| 355.33592                                        | 15.79          | 355.335928*  | [C <sub>26</sub> H <sub>43</sub> ] <sup>+</sup>  | Even             | H <sub>2</sub> O and CH <sub>3</sub> losses                 | Y (23.80)                                                                          |
| 216.18726                                        | 4.65           | 216.187252   | [C <sub>16</sub> H <sub>24</sub> ] <sup>+</sup>  | Odd              | C <sub>11</sub> H <sub>22</sub> and H <sub>2</sub> O losses | Y (4.69)                                                                           |
| 234.19782                                        | 4.54           | 234.197817   | [C <sub>16</sub> H <sub>26</sub> O] <sup>+</sup> | Odd              | C <sub>11</sub> H <sub>22</sub> loss                        | Y (2.34)                                                                           |
| 288.28114                                        | 4.36           | 288.281153*  | [C <sub>21</sub> H <sub>36</sub> ] <sup>+</sup>  | Odd              | C <sub>6</sub> H <sub>12</sub> O loss                       | Y (5.87)                                                                           |
| 219.17435                                        | 3.74           | 219.174342   | [C <sub>15</sub> H <sub>23</sub> O] <sup>+</sup> | Even             | C <sub>12</sub> H <sub>25</sub> loss                        | Y (1.40)                                                                           |
| 370.35941                                        | 3.61           | 370.359403*  | [C <sub>27</sub> H <sub>46</sub> ] <sup>+</sup>  | Odd              | [M-H <sub>2</sub> O] <sup>•+</sup>                          | Y (8.69)                                                                           |
| 201.16378                                        | 2.52           | 201.163777*  | [C <sub>15</sub> H <sub>21</sub> ] <sup>+</sup>  | Even             | C <sub>12</sub> H <sub>25</sub> and H <sub>2</sub> O losses | Y (2.77)                                                                           |
| 232.18217                                        | 2.52           | 232.182167   | [C <sub>16</sub> H <sub>24</sub> O] <sup>+</sup> | Odd              |                                                             | Y (0.87)                                                                           |
| 202.17161                                        | 1.85           | 202.171602   | [C <sub>15</sub> H <sub>22</sub> ] <sup>+</sup>  | Odd              |                                                             | Y (0.61)                                                                           |
| 178.13524                                        | 1.73           | 178.135217   | [C <sub>12</sub> H <sub>18</sub> O] <sup>+</sup> | Odd              |                                                             | Y (1.14)                                                                           |
| 331.29953                                        | 1.19           | 331.299542   | [C <sub>23</sub> H <sub>38</sub> O] <sup>+</sup> | Even             |                                                             | Y (1.60)                                                                           |
| 247.24203                                        | 0.81           | 247.242027   | [C <sub>18</sub> H <sub>31</sub> ] <sup>+</sup>  | Even             |                                                             | N                                                                                  |
| 276.28111                                        | 0.79           | 276.281153   | [C <sub>20</sub> H <sub>36</sub> ] <sup>+</sup>  | Odd              |                                                             | Y (0.74)                                                                           |
| 260.24985                                        | 0.73           | 260.249852   | [C <sub>19</sub> H <sub>32</sub> ] <sup>+</sup>  | Odd              |                                                             | Y (0.51)                                                                           |
| 359.33081                                        | 0.72           | 359.330842   | [C <sub>25</sub> H <sub>43</sub> O] <sup>+</sup> | Even             |                                                             | N                                                                                  |
| 229.19507                                        | 0.61           | 229.195077   | [C <sub>17</sub> H <sub>25</sub> ] <sup>+</sup>  | Even             |                                                             | Y (0.64)                                                                           |
| 341.32018                                        | 0.49           | 341.320278   | [C <sub>25</sub> H <sub>41</sub> ] <sup>+</sup>  | Even             |                                                             | N                                                                                  |
| 230.20287                                        | 0.47           | 230.202902   | [C <sub>17</sub> H <sub>26</sub> ] <sup>+</sup>  | Odd              |                                                             | Y (0.70)                                                                           |
| 187.14814                                        | 0.37           | 187.148127   | [C <sub>14</sub> H <sub>19</sub> ] <sup>+</sup>  | Even             |                                                             | N                                                                                  |
| 205.15873                                        | 0.34           | 205.158692   | [C <sub>14</sub> H <sub>21</sub> O] <sup>+</sup> | Even             |                                                             | N                                                                                  |



Table S.16: Ion formula assignments for the 5 $\alpha$ -sitostanol CID spectrum.

| 5 $\alpha$ -sitostanol standard fragmentation mass spectrum |                |              |                                                  |                  | Interpretation                                              | Detected in Kawangware CID spectrum, for isolation at m/z 416.40? (rel. inten., %) |
|-------------------------------------------------------------|----------------|--------------|--------------------------------------------------|------------------|-------------------------------------------------------------|------------------------------------------------------------------------------------|
| Peak m/z                                                    | Rel. inten., % | Assigned m/z | Ion formula (simplified)                         | Electron species |                                                             |                                                                                    |
| 401.37780                                                   | 100.00         | 401.377793   | [C <sub>28</sub> H <sub>49</sub> O] <sup>+</sup> | Even             | CH <sub>3</sub> loss                                        | Y (78.27)                                                                          |
| 233.18999                                                   | 98.83          | 233.189992   | [C <sub>16</sub> H <sub>25</sub> O] <sup>+</sup> | Even             | C <sub>13</sub> H <sub>27</sub> loss                        | Y (60.89)                                                                          |
| 215.17943                                                   | 56.86          | 215.179427   | [C <sub>16</sub> H <sub>23</sub> ] <sup>+</sup>  | Even             | H <sub>2</sub> O and C <sub>13</sub> H <sub>27</sub> losses | Y (100.00)                                                                         |
| 290.29677                                                   | 44.84          | 290.296803   | [C <sub>21</sub> H <sub>38</sub> ] <sup>+</sup>  | Odd              | C <sub>8</sub> H <sub>14</sub> O loss                       | Y (11.11)                                                                          |
| 416.40129                                                   | 43.54          | 416.401268   | [C <sub>29</sub> H <sub>52</sub> O] <sup>+</sup> | Odd              | [M] <sup>•+</sup>                                           | Y (6.16)                                                                           |
| 383.36723                                                   | 11.51          | 383.367228   | [C <sub>28</sub> H <sub>47</sub> ] <sup>+</sup>  | Even             | H <sub>2</sub> O and CH <sub>3</sub> losses                 | Y (76.84)                                                                          |
| 234.19782                                                   | 10.42          | 234.197817   | [C <sub>16</sub> H <sub>26</sub> O] <sup>+</sup> | Odd              | C <sub>13</sub> H <sub>26</sub> loss                        | Y (2.97)                                                                           |
| 216.18725                                                   | 8.31           | 216.187252   | [C <sub>16</sub> H <sub>24</sub> ] <sup>+</sup>  | Odd              | H <sub>2</sub> O and C <sub>13</sub> H <sub>26</sub> losses | Y (6.83)                                                                           |
| 398.39071                                                   | 5.04           | 398.390703   | [C <sub>29</sub> H <sub>50</sub> ] <sup>+</sup>  | Odd              | H <sub>2</sub> O loss                                       | Y (4.33)                                                                           |
| 316.31243                                                   | 4.90           | 316.312453   | [C <sub>23</sub> H <sub>40</sub> ] <sup>+</sup>  | Odd              | C <sub>6</sub> H <sub>12</sub> O loss                       | Y (5.59)                                                                           |
| 219.17436                                                   | 4.90           | 219.174342   | [C <sub>15</sub> H <sub>23</sub> O] <sup>+</sup> | Even             | C <sub>14</sub> H <sub>29</sub> loss                        | Y (2.07)                                                                           |
| 232.18217                                                   | 4.10           | 232.182167   | [C <sub>16</sub> H <sub>24</sub> O] <sup>+</sup> | Odd              | C <sub>13</sub> H <sub>28</sub> loss                        | Y (1.16)                                                                           |
| 201.16378                                                   | 2.64           | 201.163777   | [C <sub>15</sub> H <sub>21</sub> ] <sup>+</sup>  | Even             | C <sub>14</sub> H <sub>29</sub> and H <sub>2</sub> O losses | Y (11.26)                                                                          |
| 178.13521                                                   | 2.35           | 178.135217   | [C <sub>12</sub> H <sub>18</sub> O] <sup>+</sup> | Odd              |                                                             | Y (1.14)                                                                           |
| 202.17161                                                   | 2.26           | 202.171602   | [C <sub>15</sub> H <sub>22</sub> ] <sup>+</sup>  | Odd              |                                                             | Y (0.88)                                                                           |
| 359.33086                                                   | 1.79           | 359.330842   | [C <sub>25</sub> H <sub>43</sub> O] <sup>+</sup> | Even             |                                                             | Y (2.56)                                                                           |
| 304.31245                                                   | 1.17           | 304.312453   | [C <sub>22</sub> H <sub>40</sub> ] <sup>+</sup>  | Odd              |                                                             | Y (1.03)                                                                           |
| 387.36238                                                   | 1.14           | 387.362143   | [C <sub>27</sub> H <sub>47</sub> O] <sup>+</sup> | Even             |                                                             | N                                                                                  |
| 229.19510                                                   | 0.78           | 229.195077   | [C <sub>17</sub> H <sub>25</sub> ] <sup>+</sup>  | Even             |                                                             | Y (2.69)                                                                           |

Table S.17: The main sterol standard CID fragments, and whether they were present (P) or absent (A) in the corresponding mid-Kawangware CID spectra. NIS = not in standard compound CID spectrum.

| CID<br>Fragment                                                                           | Kawangware sample peak isolations with CID |                        |                |
|-------------------------------------------------------------------------------------------|--------------------------------------------|------------------------|----------------|
|                                                                                           | m/z 386.35                                 | m/z 414.39             | m/z 412.37     |
|                                                                                           | 'Cholesterol'                              | ' $\beta$ -sitosterol' | 'Stigmasterol' |
| CH <sub>3</sub> loss                                                                      | P                                          | P                      | P              |
| H <sub>2</sub> O loss                                                                     | P                                          | P                      | P              |
| CH <sub>3</sub> and H <sub>2</sub> O losses                                               | P                                          | P                      | P              |
| C <sub>3</sub> H <sub>7</sub> O loss (Fig. S.13(a))                                       | P                                          | P                      | A              |
| C <sub>5</sub> H <sub>9</sub> O loss (Fig. S.13 (b))                                      | P                                          | P                      | A              |
| Side chain loss (Fig. S.13 (e))                                                           | P                                          | P                      | A (NIS)        |
| Side chain and H <sub>2</sub> O losses (Fig. S.13 (f))                                    | P                                          | P                      | P              |
| Side chain (plus H <sub>2</sub> ) loss (Fig. S.13 (g))                                    | A (NIS)                                    | A (NIS)                | P              |
| Side chain (plus H <sub>2</sub> ) and H <sub>2</sub> O losses (Fig. S.13 (h))             | A (NIS)                                    | A (NIS)                | P              |
| Side chain plus C <sub>3</sub> H <sub>6</sub> loss (Fig. S.14 (i))                        | P                                          | P                      | P              |
| Side chain plus C <sub>3</sub> H <sub>6</sub> and H <sub>2</sub> O losses (Fig. S.14 (j)) | P                                          | P                      | P              |
| Side chain plus C <sub>4</sub> H <sub>8</sub> loss (Fig. S.14 (o))                        | A (NIS)                                    | P                      | A              |
| Side chain plus C <sub>4</sub> H <sub>8</sub> and H <sub>2</sub> O losses (Fig. S.14 (p)) | P                                          | P                      | P              |

Table S.18. The main stanol standard CID fragments, and whether they were present (P) or absent (A) in the corresponding mid-Kawangware CID spectra. NIS = not in standard compound CID spectrum.

| CID Fragment                                                                              | Kawangware sample peak isolations with CID |               |                          |
|-------------------------------------------------------------------------------------------|--------------------------------------------|---------------|--------------------------|
|                                                                                           | m/z 388.37                                 | m/z 388.37    | m/z 416.40               |
|                                                                                           | 'Coprostanol'                              | 'Cholestanol' | '5 $\alpha$ -sitostanol' |
| CH <sub>3</sub> loss                                                                      | P                                          | P             | P                        |
| H <sub>2</sub> O loss                                                                     | P                                          | P             | P                        |
| CH <sub>3</sub> and H <sub>2</sub> O losses                                               | P                                          | P             | P                        |
| C <sub>8</sub> H <sub>14</sub> O loss (Fig. S.13 (c))                                     | P                                          | P             | P                        |
| C <sub>6</sub> H <sub>12</sub> O loss (Fig. S.13 (d))                                     | P                                          | P             | P                        |
| Side chain plus C <sub>3</sub> H <sub>6</sub> loss (Fig. S.14 (k))                        | P                                          | P             | P                        |
| Side chain plus C <sub>3</sub> H <sub>5</sub> loss (Fig. S.14 (l))                        | P (NIS)                                    | P             | P                        |
| Side chain plus C <sub>3</sub> H <sub>6</sub> and H <sub>2</sub> O losses (Fig. S.14 (m)) | P                                          | P             | P                        |
| Side chain plus C <sub>3</sub> H <sub>5</sub> and H <sub>2</sub> O losses (Fig. S.14 (n)) | P (NIS)                                    | P             | P                        |
| Side chain plus C <sub>4</sub> H <sub>8</sub> loss (Fig. S.14 (q))                        | P (NIS)                                    | P             | P                        |
| Side chain plus C <sub>4</sub> H <sub>8</sub> and H <sub>2</sub> O losses (Fig. S.14 (r)) | P                                          | P             | P                        |

## Supplementary Figures

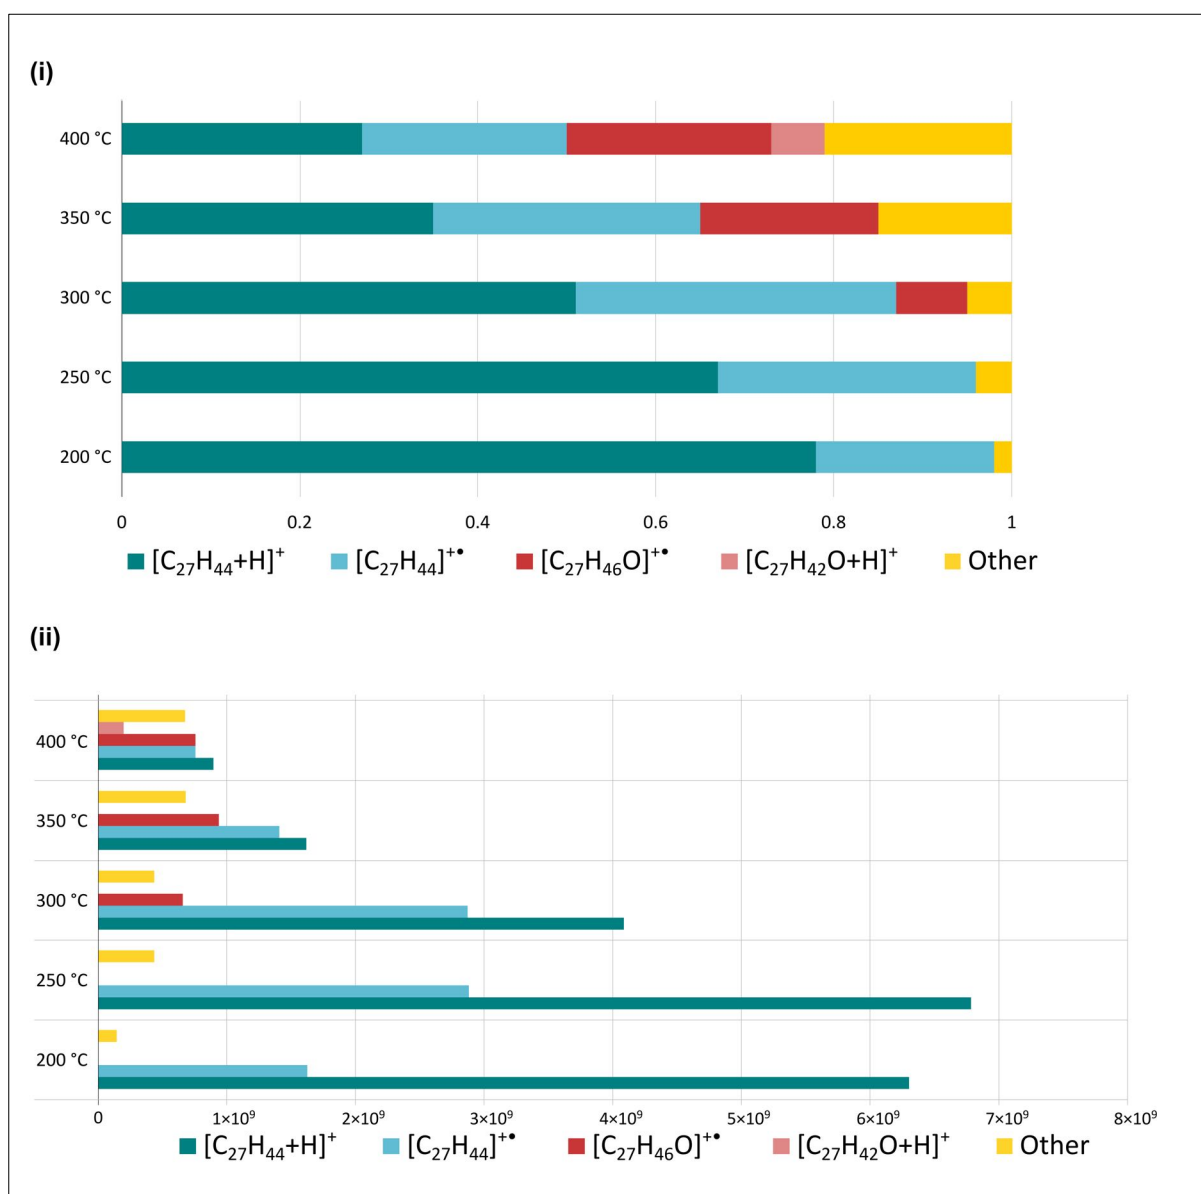

Figure S.1. Cholesterol ion species detected via broadband (+)APPI-FTICR MS, with the source vaporizer set to different temperatures. (i) Scaled signal contributions for the main ion species. (ii) Absolute signal intensity for the main ion species.

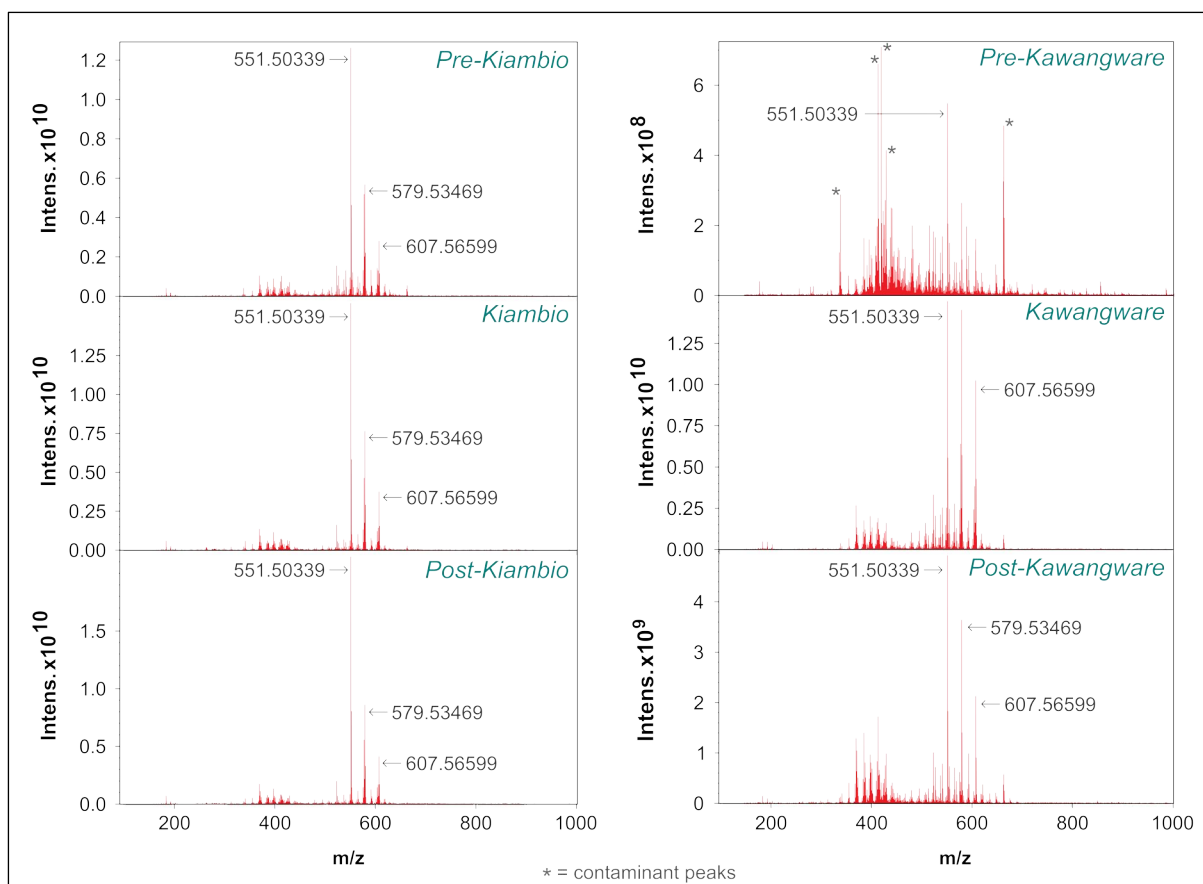

Figure S.2. Broadband APPI-FTICR MS overviews of the Nairobi sediments (magnitude mode).

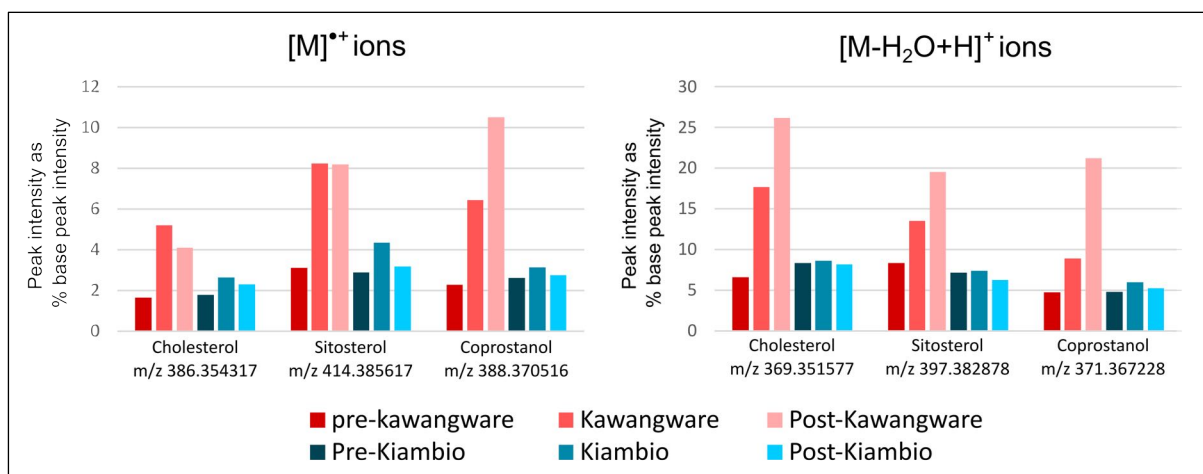

Figure S.3. Relative intensities of detected ions potentially representing the steroids cholesterol,  $\beta$ -sitosterol, and coprostanol.

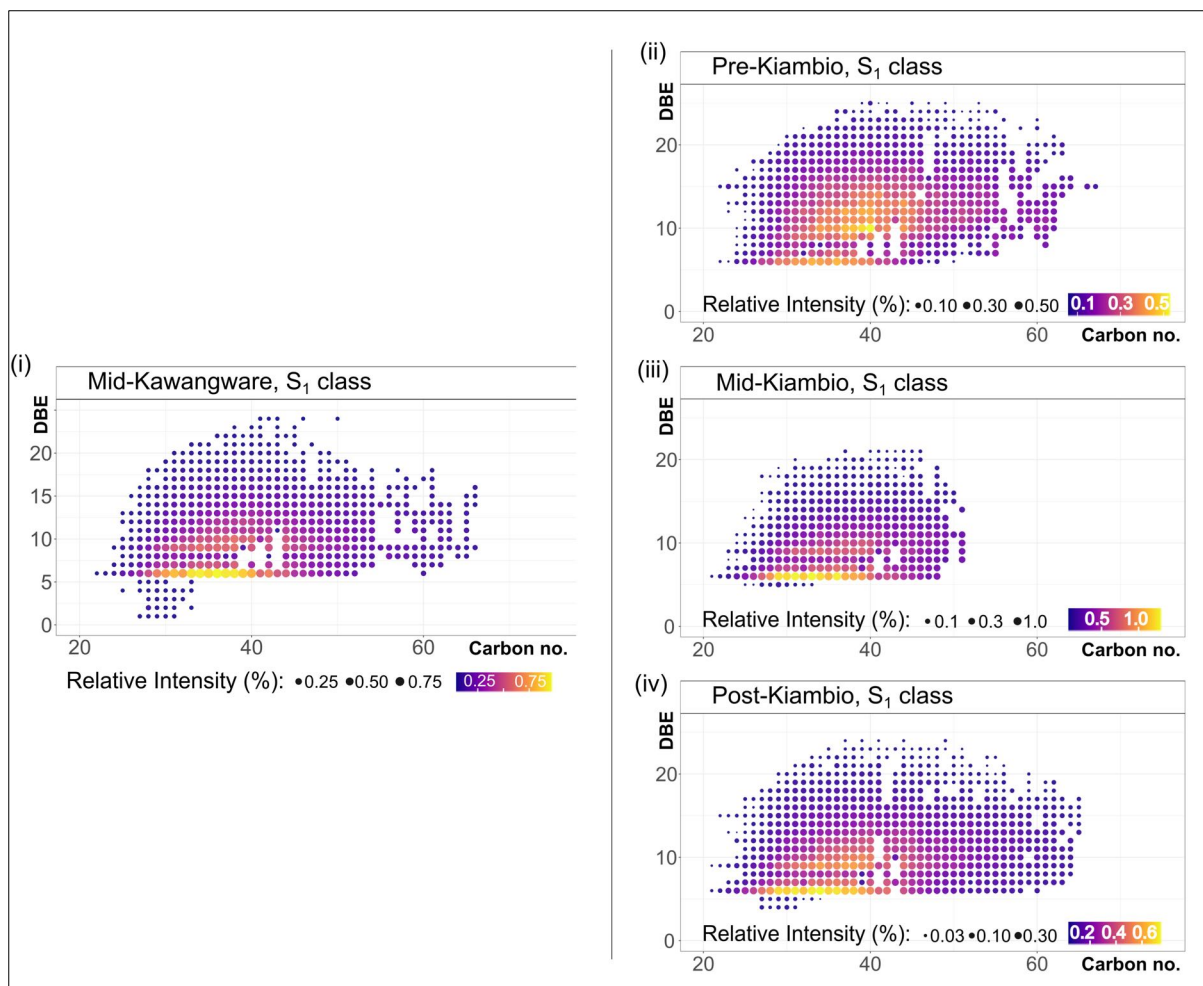

Figure S.4. S<sub>1</sub> class DBE versus carbon number plots (monoisotopic). (i) Kawangware, (ii)-(iv) Kiambio sites.

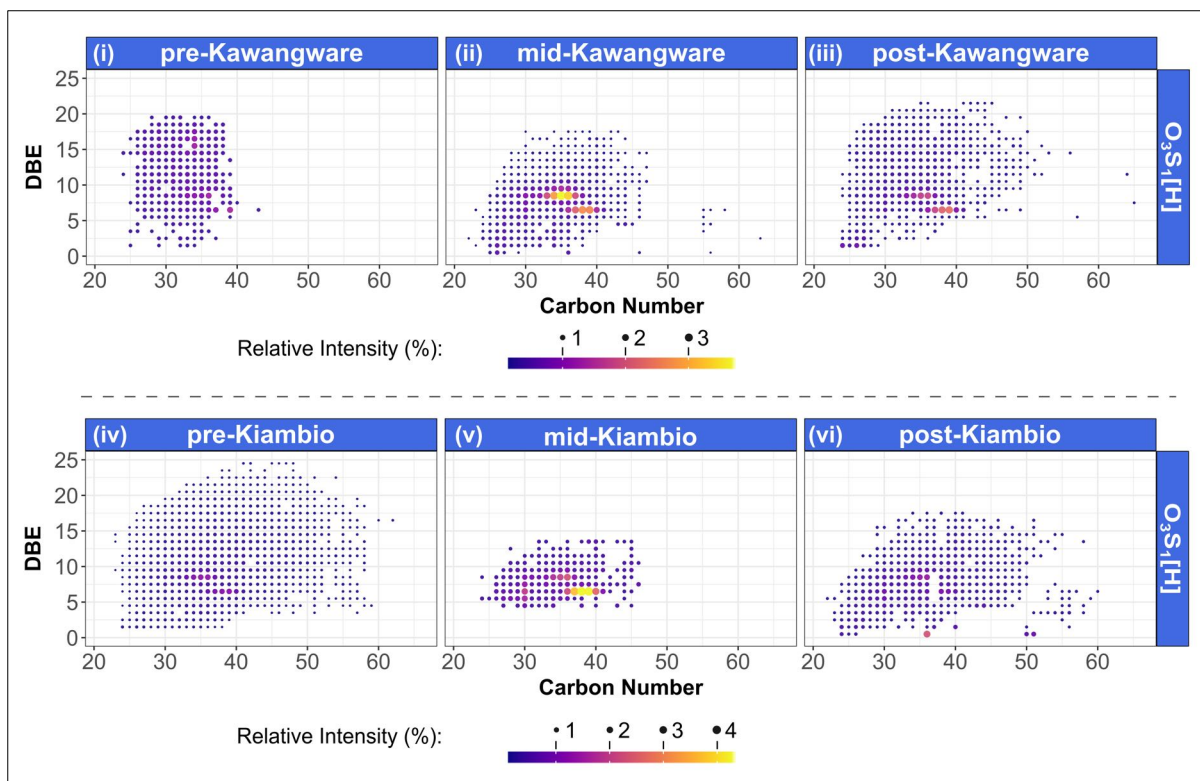

Figure S.5.  $O_3S_1[H]$  class DBE versus carbon number plots (monoisotopic). (i)-(iii) Kawangware sites, (iv)-(vi) Kiambio sites.

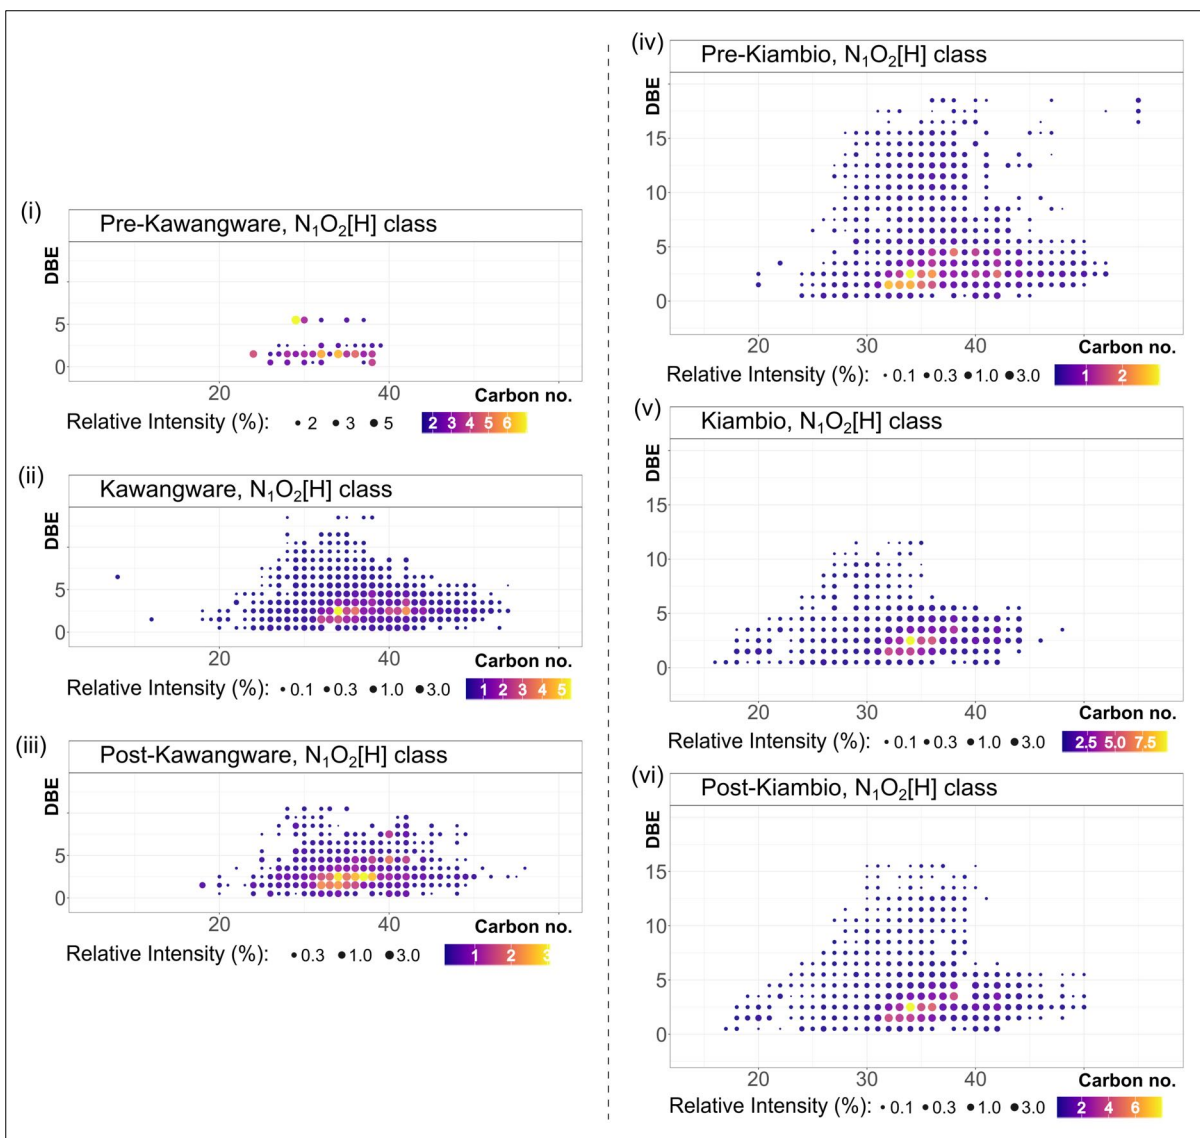

Figure S.6.  $N_1O_2[H]$  class DBE versus carbon number plots (monoisotopic). (i)-(iii) Kawangware sites, (iv)-(vi) Kiambio sites.



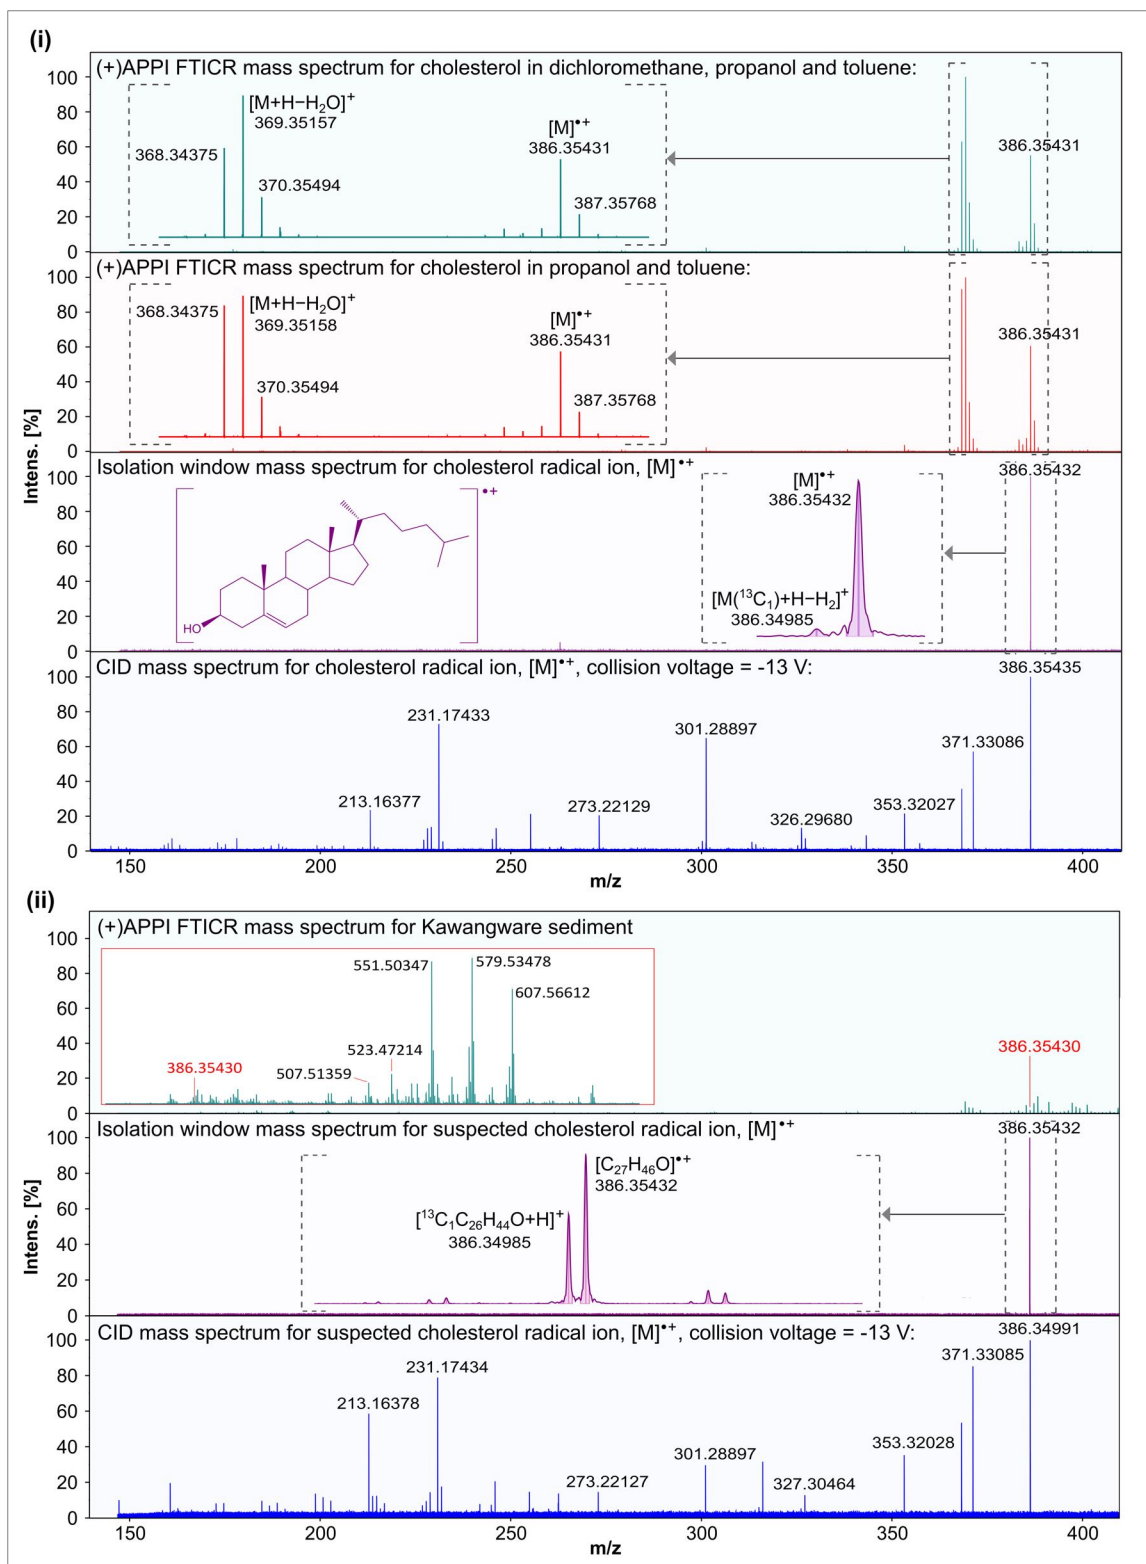

Figure S.7. APPI FTICR broadband, isolation, and CID spectra for the cholesterol standard (i) and Kawangware sample (ii). N.B.  $m/z$  values reflect independent recalibrations.

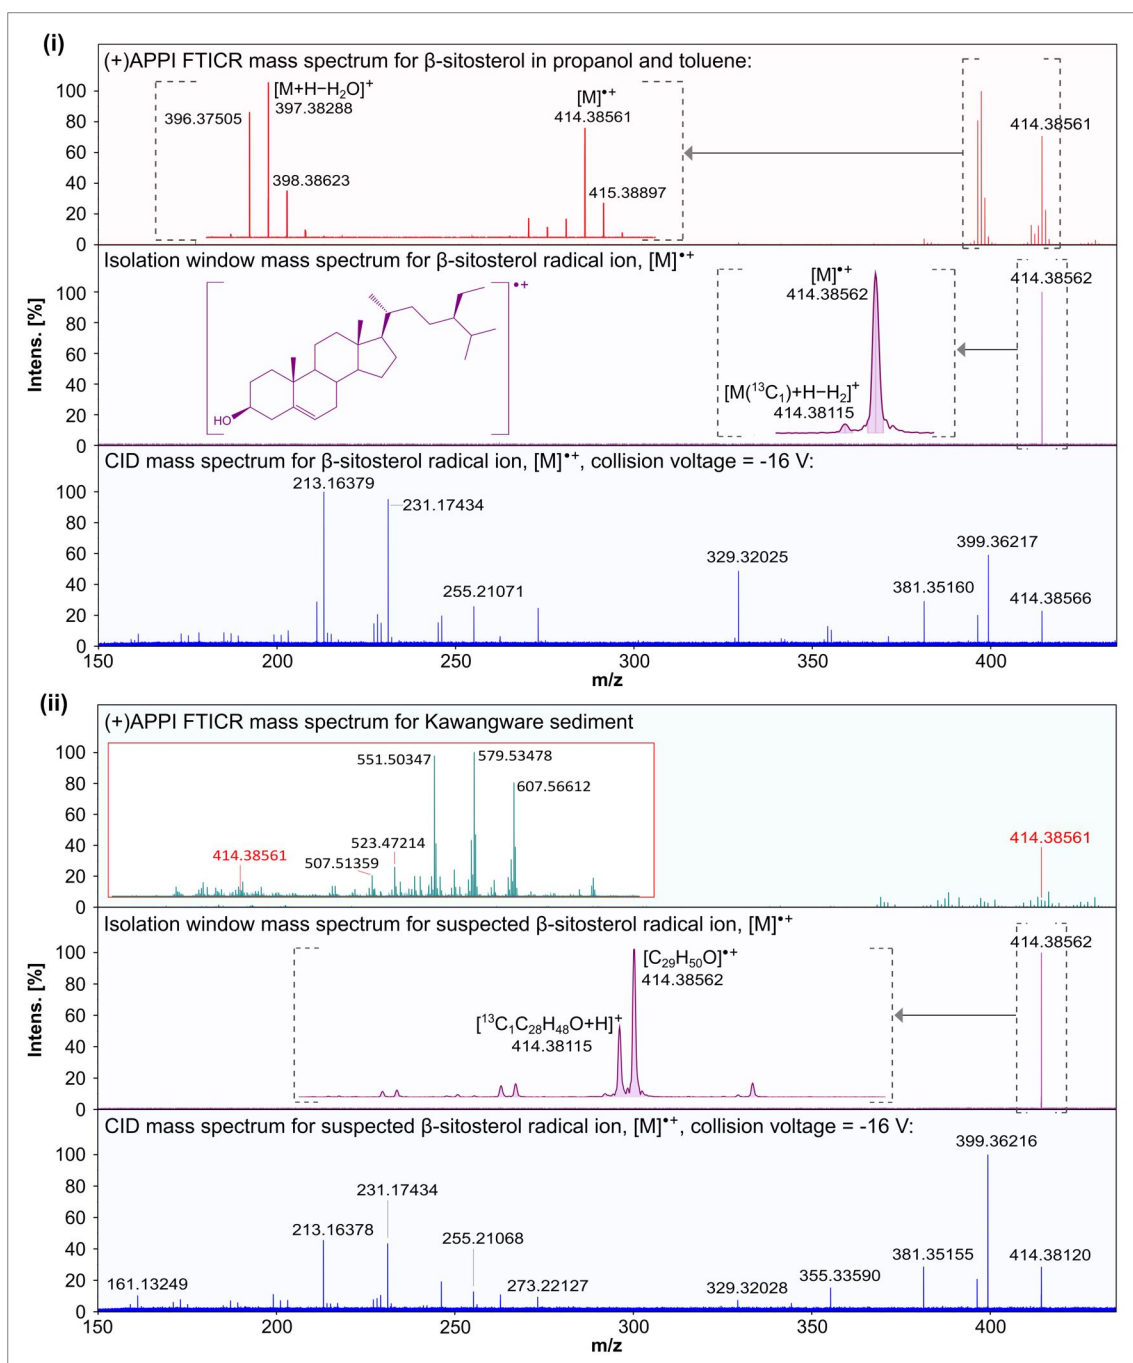

Figure S.8. APPI FTICR broadband, isolation, and CID spectra for the  $\beta$ -sitosterol standard (i) and Kawangware sample (ii). N.B.  $m/z$  values reflect independent recalibrations.

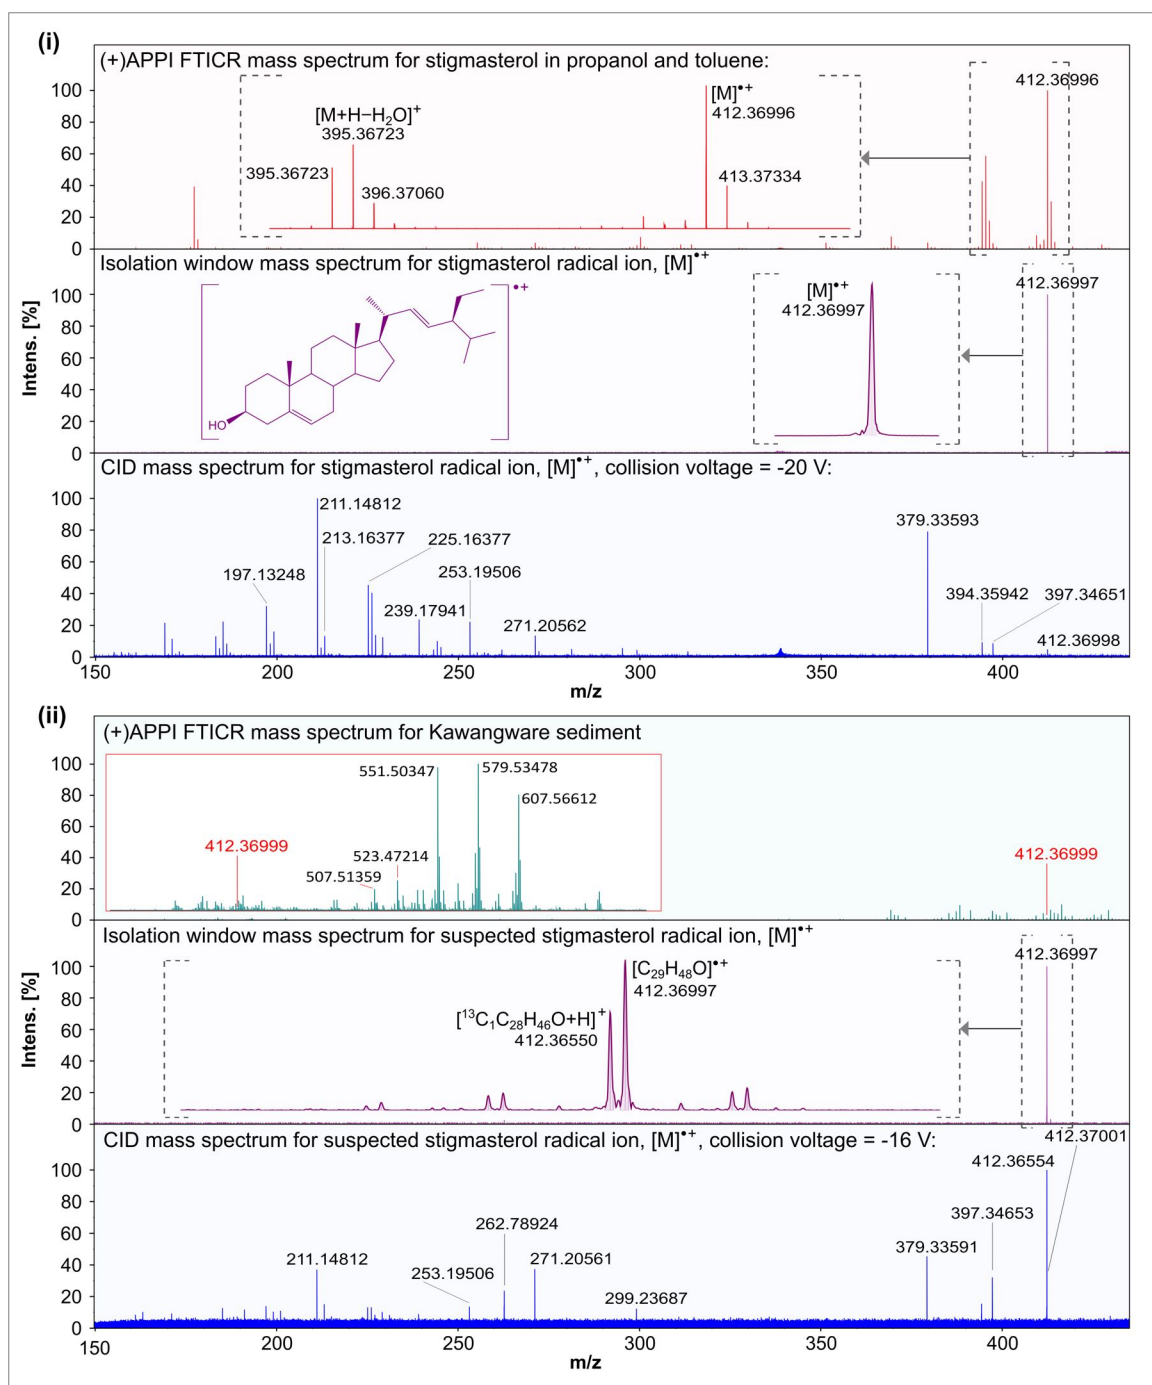

Figure S.9. APPI FTICR broadband, isolation, and CID spectra for the stigmasterol standard (i) and Kawangware sample (ii). N.B. m/z values reflect independent recalibrations.

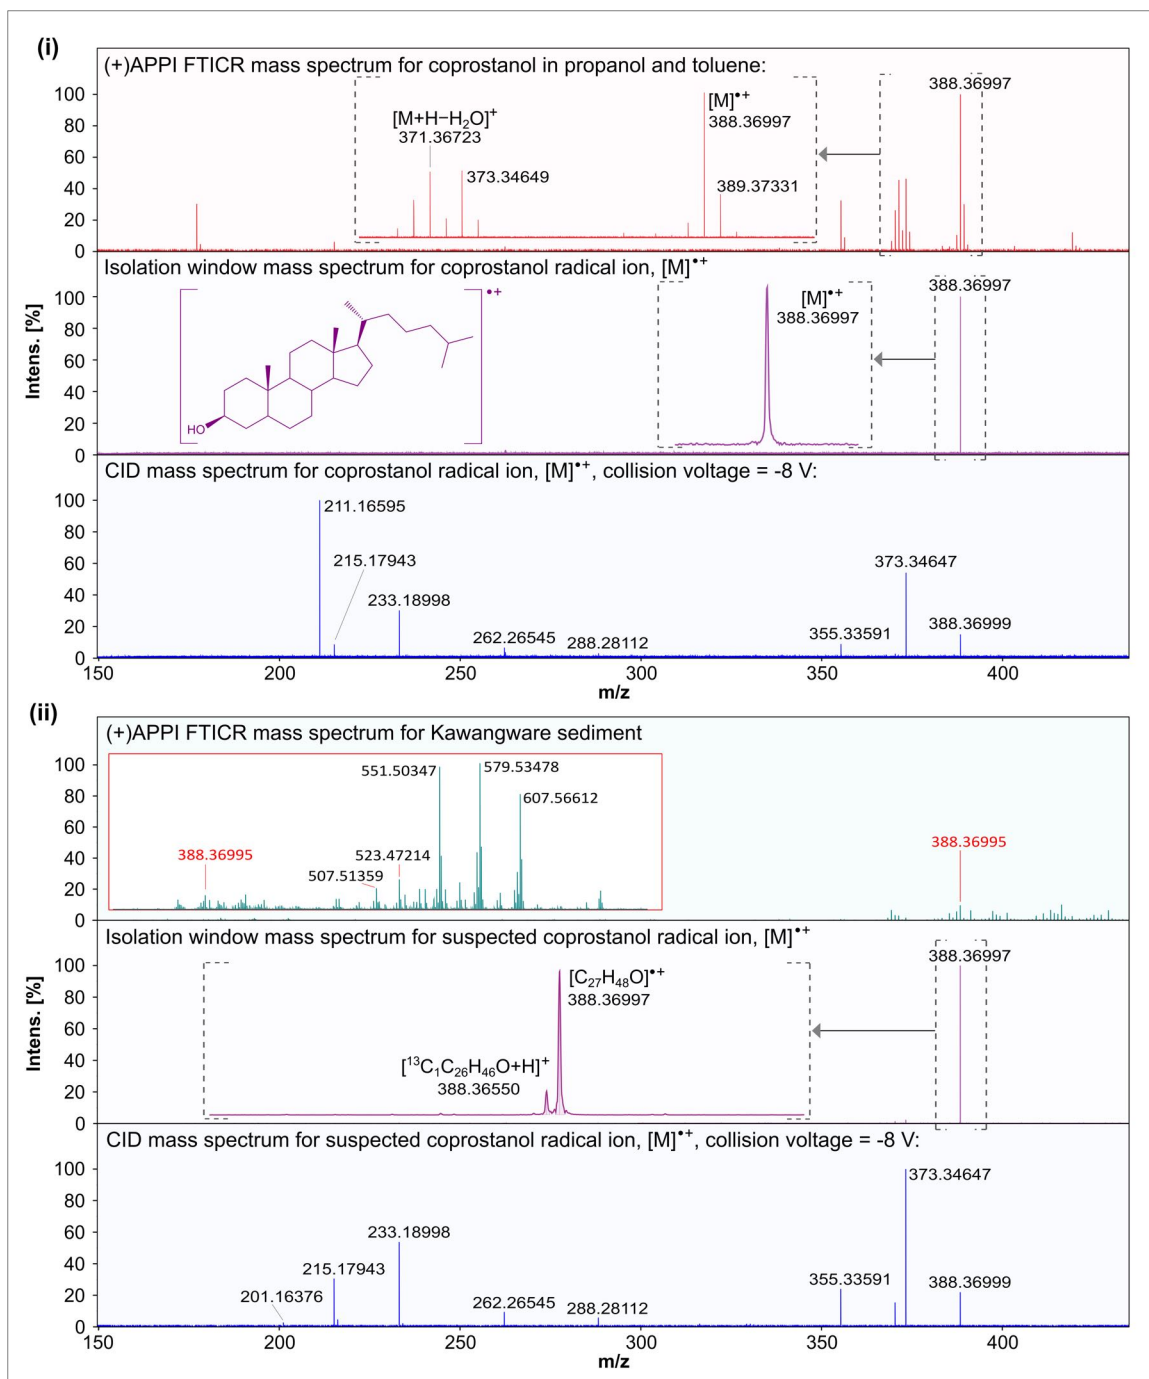

Figure S.10. APPI FTICR broadband, isolation, and CID spectra for the coprostanol standard (i) and Kawangware sample (ii). N.B.  $m/z$  values reflect independent recalibrations.

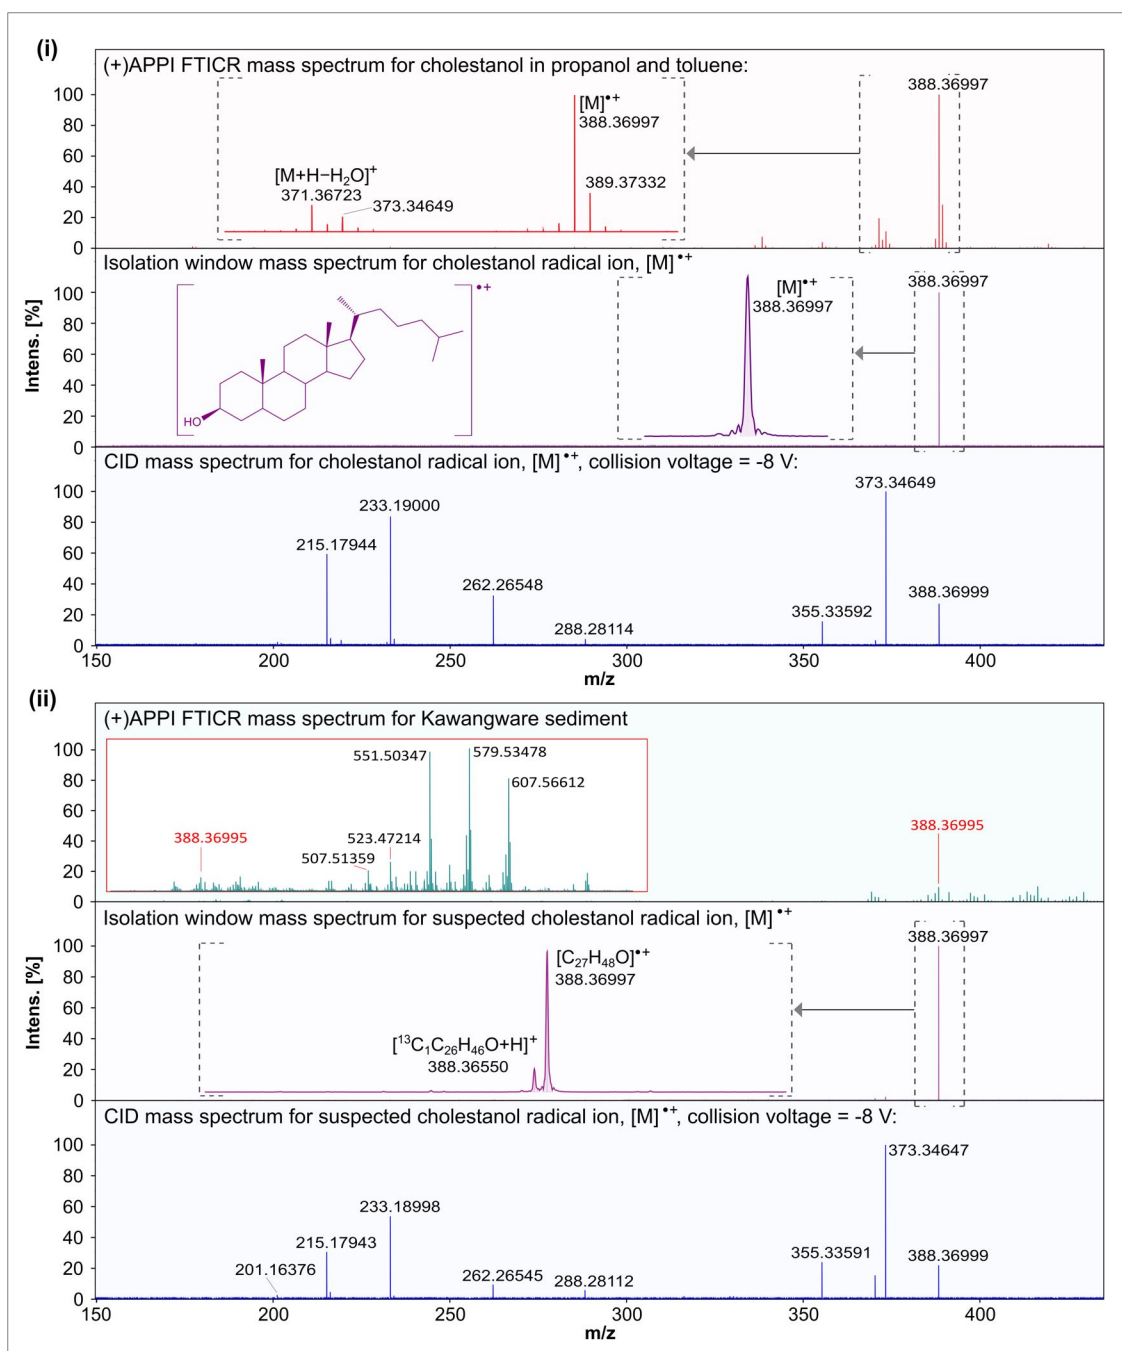

Figure S.11. APPI FTICR broadband, isolation, and CID spectra for the cholesterol standard (i) and Kawangware sample (ii). N.B.  $m/z$  values reflect independent recalibrations.

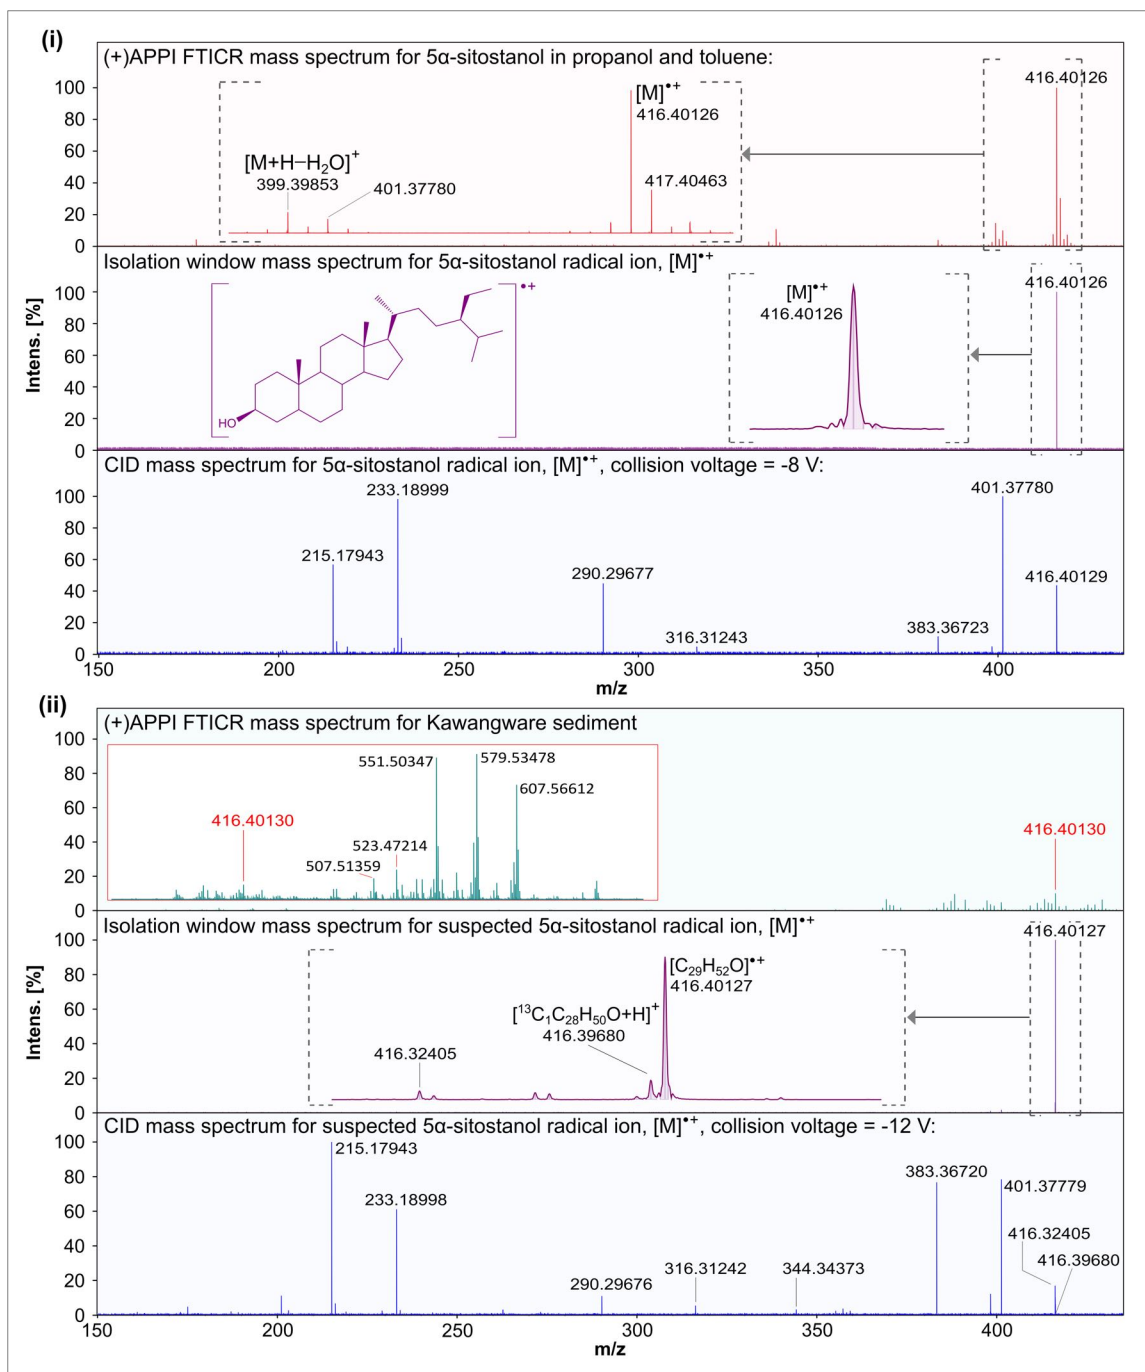

Figure S.12. APPI FTICR broadband, isolation, and CID spectra for the 5 $\alpha$ -sitostanol standard (i) and Kawangware sample (ii). N.B.  $m/z$  values reflect independent recalibrations.



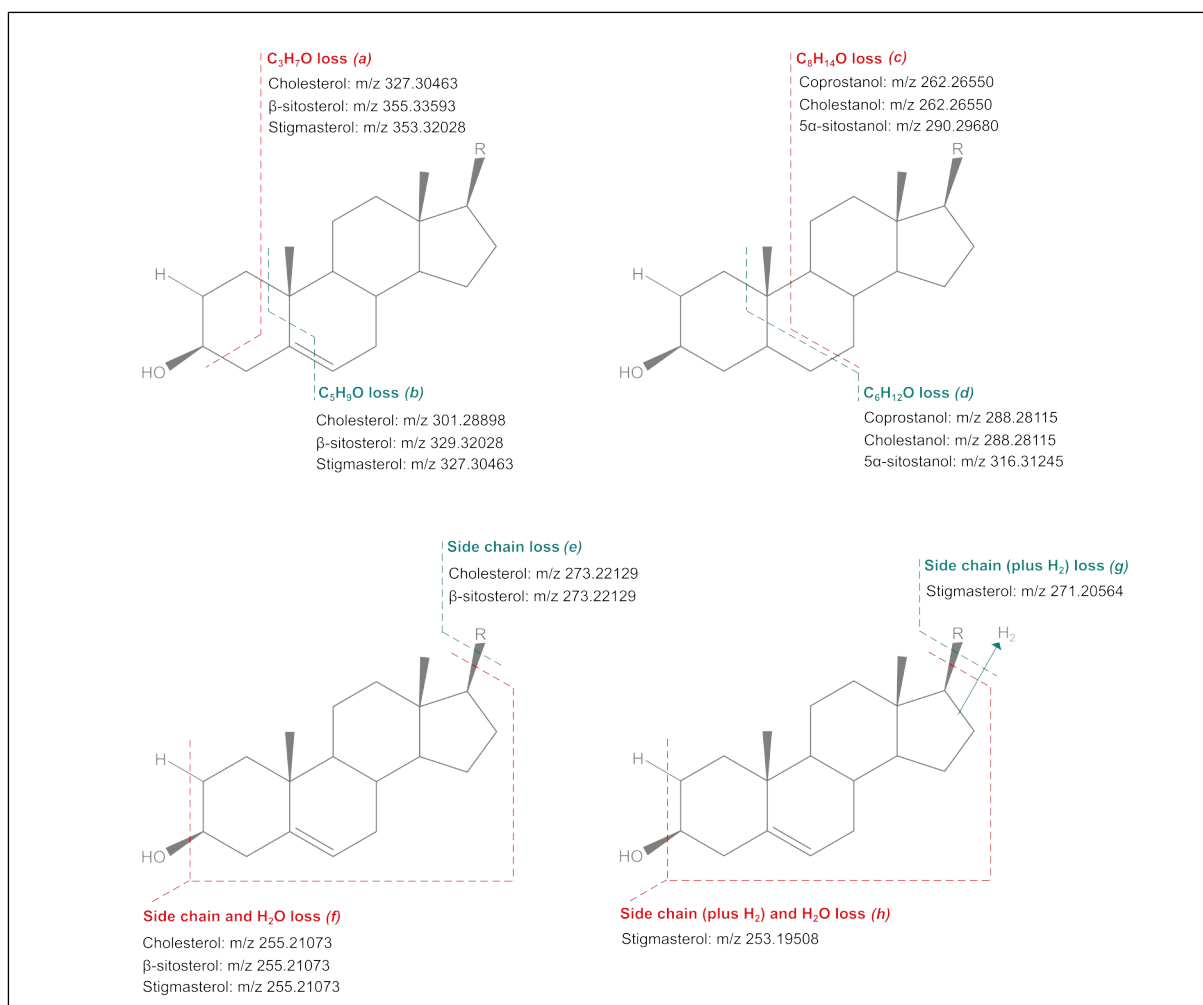

Figure S.13. A selection of proposed sterol and stanol fragmentations as measured for standards by APPI-FTICR MS with CID. Fragmentation (a) proposed by Nakakuni et al.<sup>3</sup>. Fragmentation (b) and (e) proposed by van Agthoven et al.<sup>1</sup> and West and Reid<sup>2</sup>. Fragmentation (f) proposed by Moreau et al.<sup>4</sup>. N.B. side chain cleavages as per (e) was not observed for stanols.

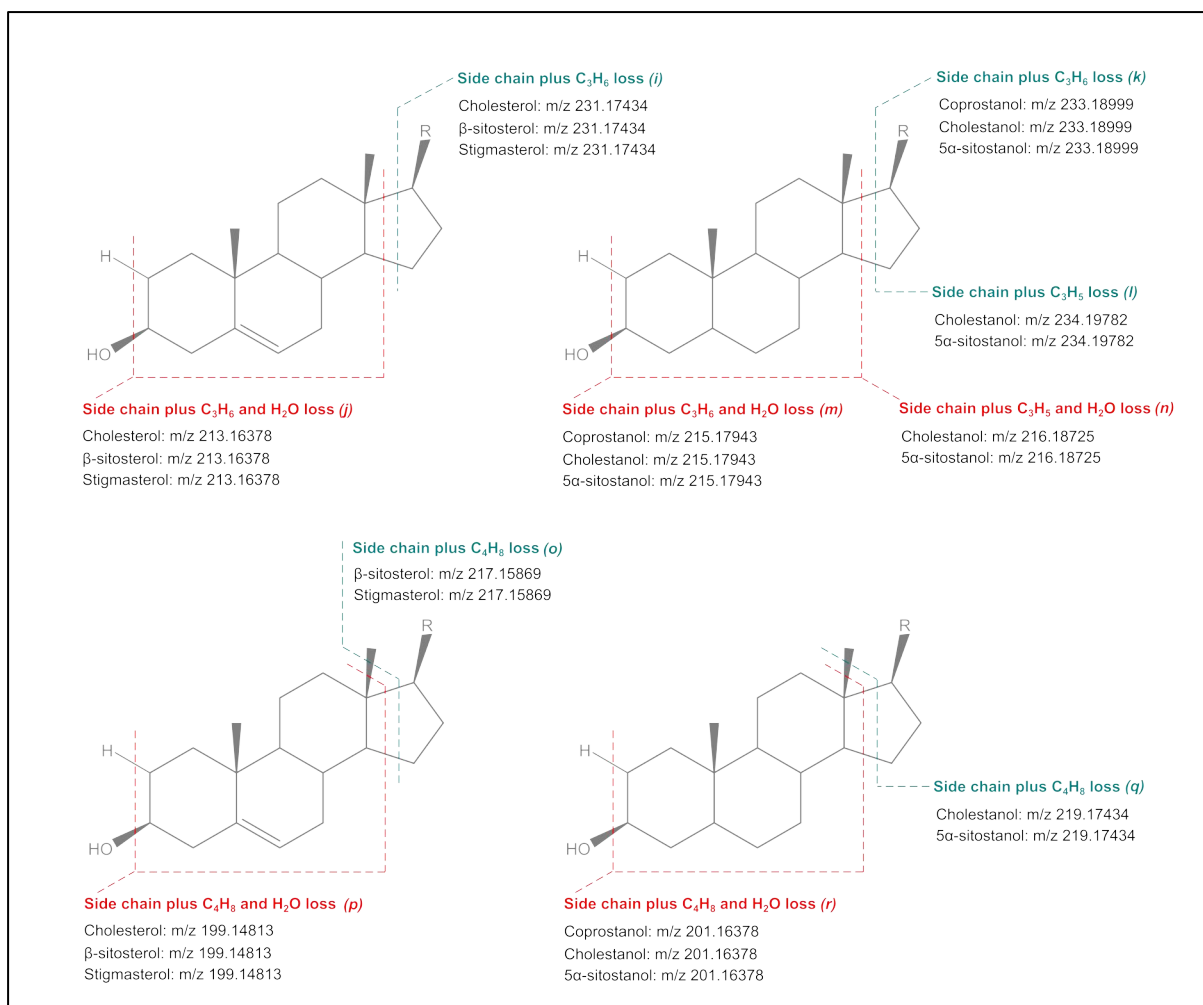

Figure S.14. A selection of proposed sterol and stanol fragmentations as measured for standards by APPI-FTICR MS with CID. Fragmentation (i) proposed by van Agthoven et al.<sup>1</sup> and West and Reid<sup>2</sup>. Fragmentation (l) proposed by Nakakuni et al.<sup>3</sup>. N.B. a m/z 201.16278 peak was also observed for  $\beta$ -sitosterol and stigmasterol, and a m/z 215.17943 peak was detected for  $\beta$ -sitosterol.

## References

1. van Agthoven, M.; Barrow, M.; Chiron, L.; Coutouly, M.; Kilgour, D.; Wootton, C.; Wei, J.; Soulby, A.; Delsuc, M.; Rolando, C.; et al. Differentiating Fragmentation Pathways of Cholesterol by Two-Dimensional Fourier Transform Ion Cyclotron Resonance Mass Spectrometry. *J. Am. Soc. Mass Spectrom.* **2015**, *26* (12), 2105-2114. DOI: 10.1007/s13361-015-1226-7
2. West, H.; Reid, G. Hybrid 213 nm Photodissociation of Cationized Sterol Lipid Ions Yield  $[M]^+$  Radical Products for Improved Structural Characterization Using Multistage Tandem Mass Spectrometry. *Anal. Chim. Acta* **2021**, *1141*, 100-109. DOI: 10.1016/j.aca.2020.10.013
3. Nakakuni, M.; Yamasaki, Y.; Yoshitake, N.; Takehara, K.; Yamamoto, S. Methyl Ether-Derivatized Sterols and Coprostanol Produced via Thermochemolysis Using



Tetramethylammonium Hydroxide (TMAH). *Molecules* **2019**, *24* (22). DOI: 10.3390/molecules24224040

**4.** Moreau, R.; Whitaker, B.; Hicks, K. Phytosterols, Phytostanols, and their Conjugates in Foods: Structural Diversity, Quantitative Analysis, and Health-Promoting Uses. *Prog. Lipid Res.* **2002**, *41* (6), 457-500. DOI: 10.1016/S0163-7827(02)00006-1
